# Supplementary material for: cAMP and c-di-GMP synergistically support biofilm maintenance through the direct interaction of their effectors
Source: PubMed Central journal article supplement (PMC8938473; doi:10.1038/s41467-022-29240-5), 2022-03-21
Supplement: 41467_2022_29240_MOESM1_ESM.pdf [file 41467_2022_29240_MOESM1_ESM.pdf]

## Supplementary Information

### **cAMP and c-di-GMP synergistically support biofilm maintenance through the direct interaction of their effectors**

Cong Liu<sup>1,2</sup>, Di Sun<sup>1,2</sup>, Jiawen Liu<sup>1</sup>, Ying Chen<sup>1</sup>, Xuge Zhou<sup>1</sup>, Yunrui Ru<sup>1</sup>, Jingrong Zhu<sup>1</sup>, Weijie Liu<sup>1,\*</sup>

<sup>1</sup>Jiangsu Key Laboratory of Phylogenomics & Comparative Genomics, School of Life Science, Jiangsu Normal University, Xuzhou, China

<sup>2</sup>These authors contributed equally: Cong Liu, Di Sun.

\*Correspondence:

Weijie Liu, Tel: +86 18252161264; E-mail: [leonliu2013@126.com](mailto:leonliu2013@126.com) (WJ Liu)

Postal address of corresponding author, Weijie Liu

No.101, Shanghai road, Tongshan new district, Xuzhou 221116, Jiangsu Province, China

## Supplementary Figures

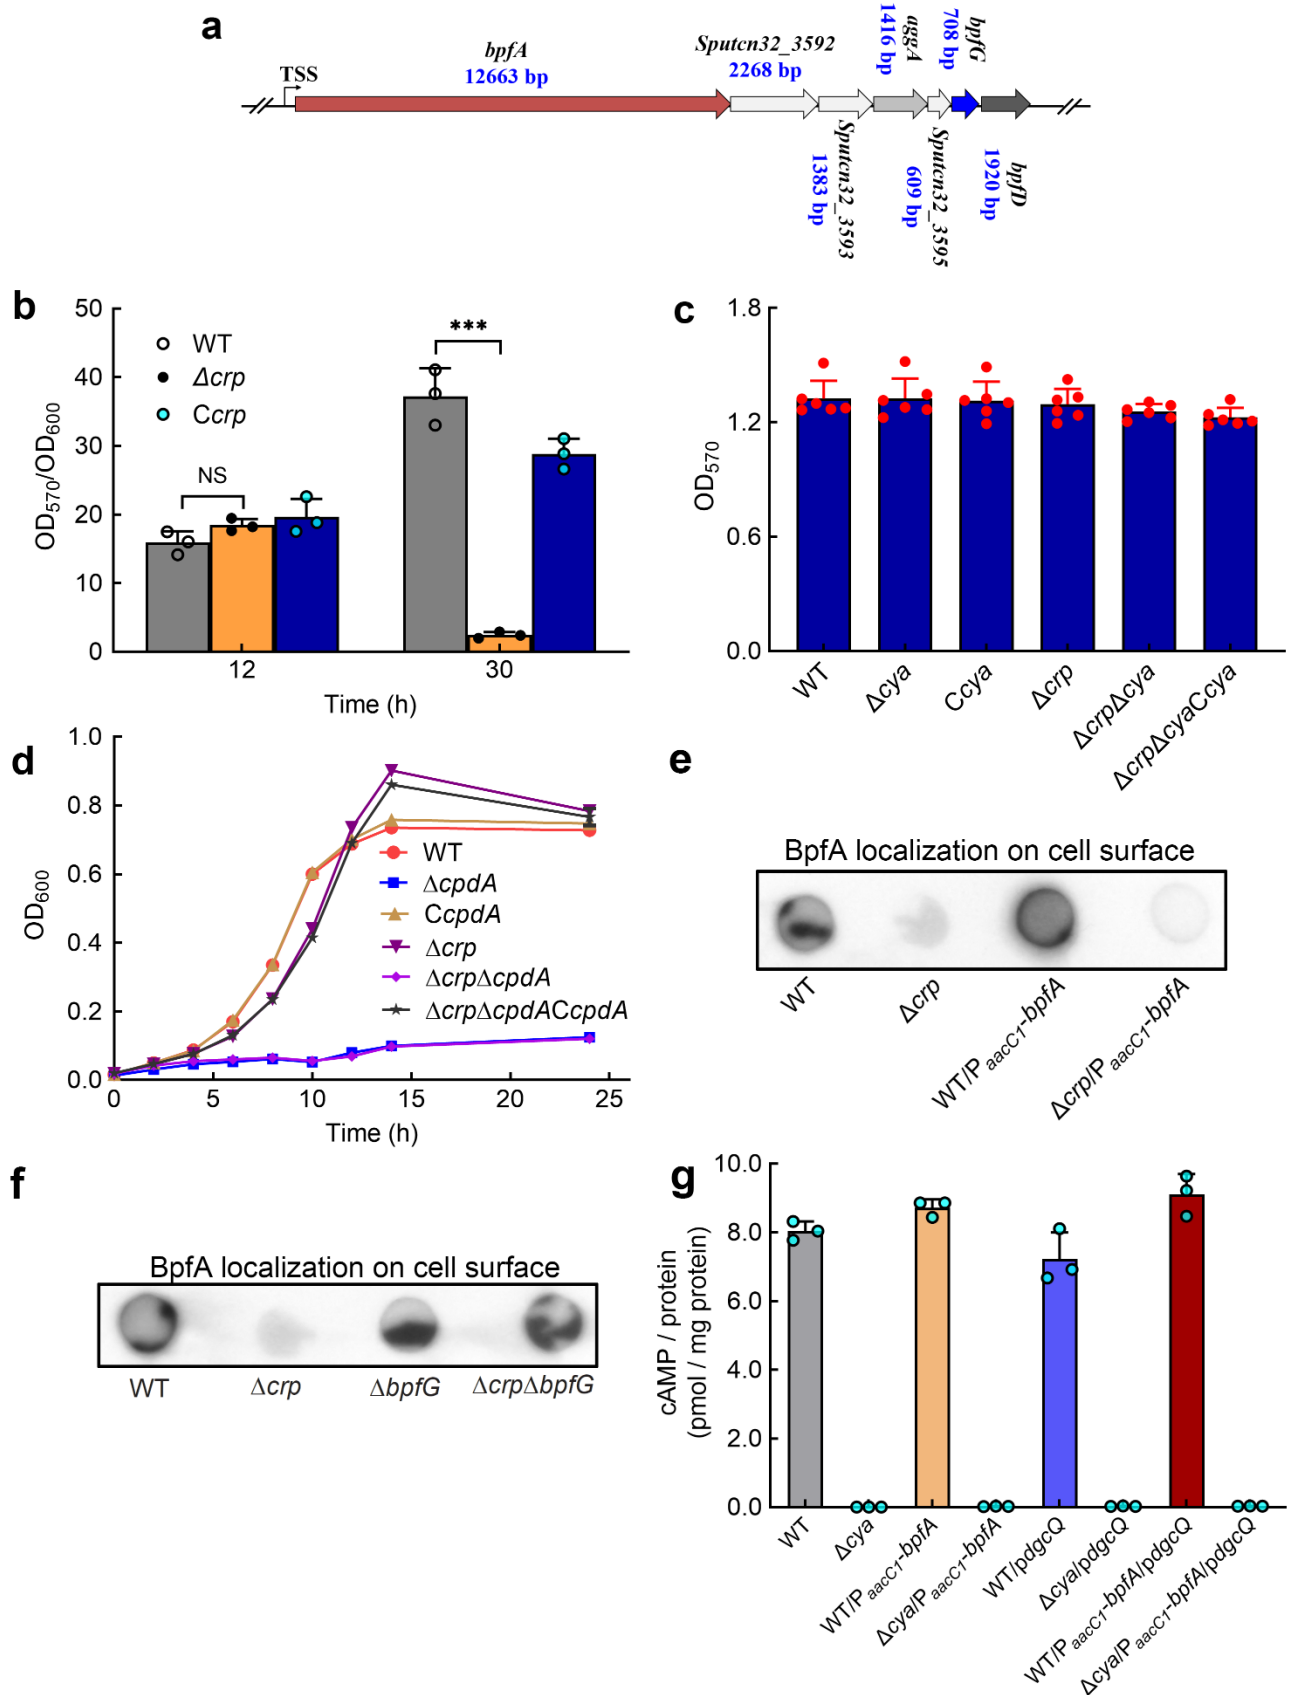

**Supplementary Fig. 1** **a** Schematic diagram of the *bpfA* operon. **b** The ratio of biofilm biomass to cell growth ( $OD_{570}/OD_{600}$ ) at 12 h and 30 h ( $n=3$  independent samples). **c** Biofilm biomass at 12 h

(n=6 independent samples). **d** Cell growth of *cpdA*-related strains (n=3 independent samples). **e, f** BpfA localization on the cell surface detected by dot blotting analysis. **g** Intracellular cAMP concentration (n=3 independent samples). Data in **b, c, d, g** are shown as the mean  $\pm$  SD. Two-sided Student's *t*-test was used in **b** to analyze the statistical significance (NS: No significance. \*\*\*:  $p < 0.001$ ). Source data are provided as a Source Data file.

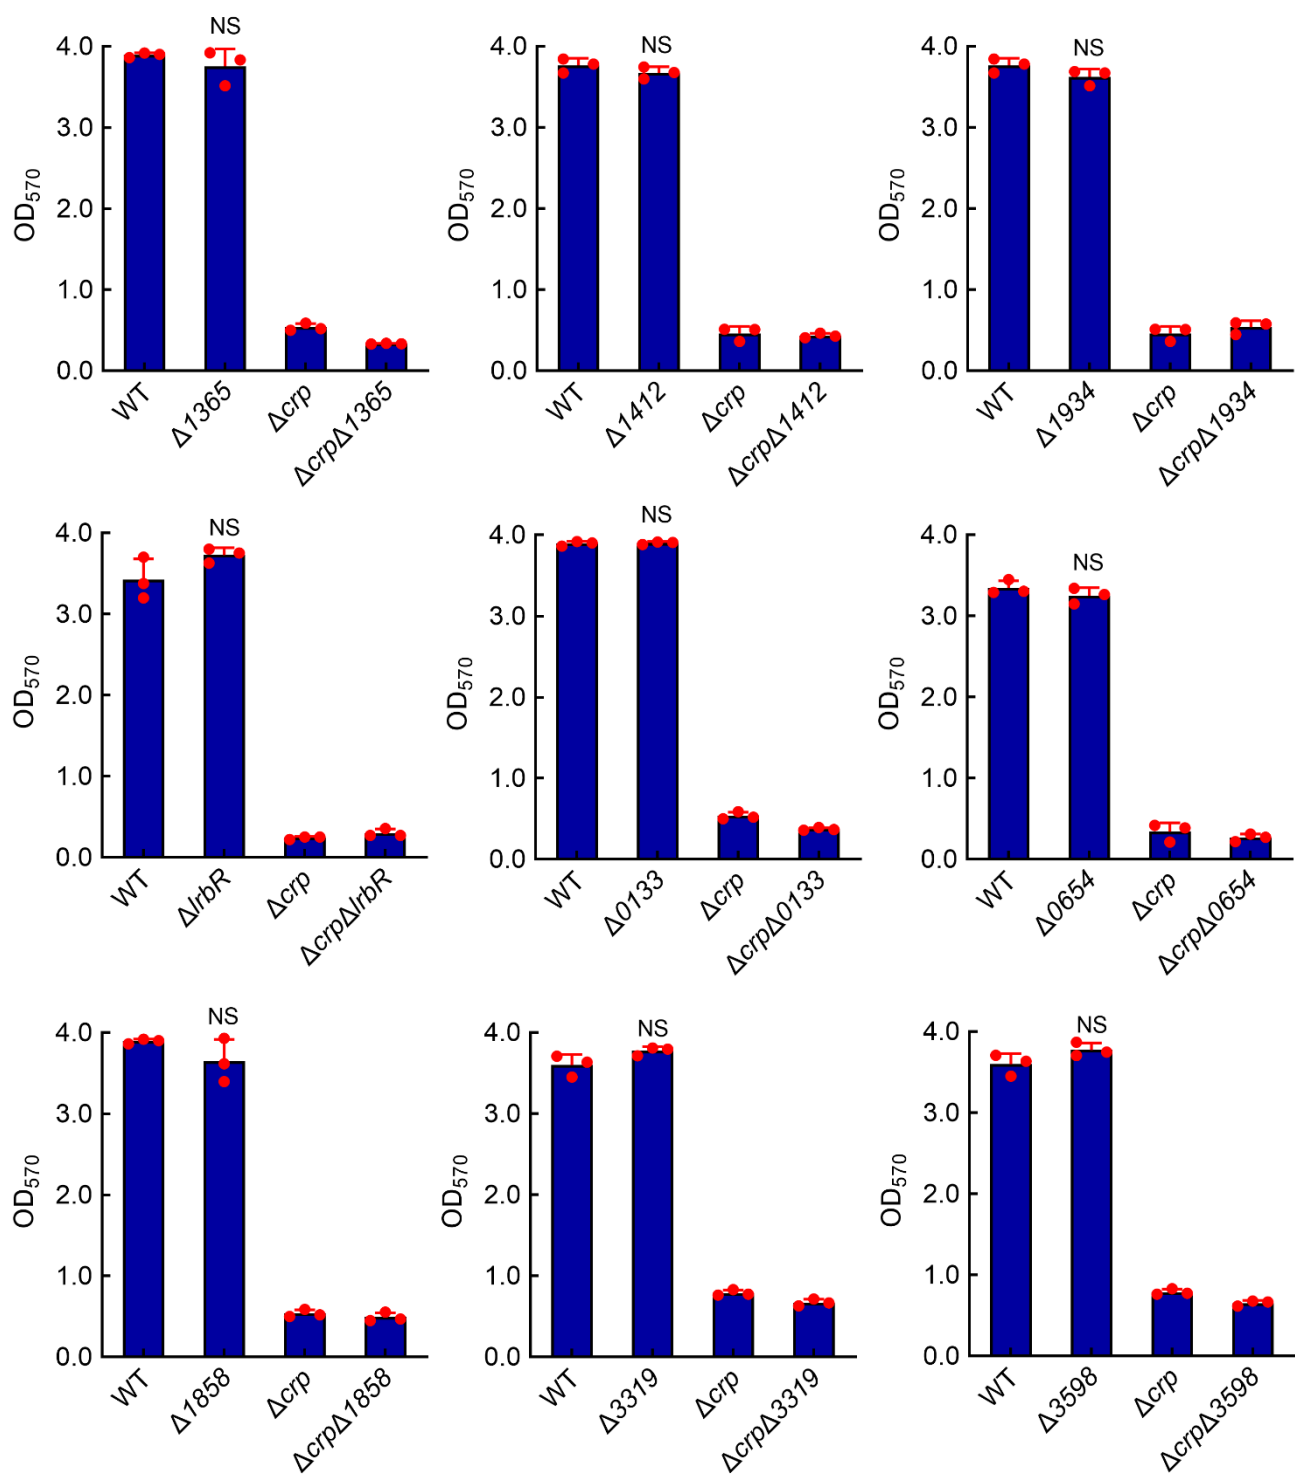

**Supplementary Fig. 2** The biofilm biomasses at 30 h of mutants with deletion of *dgc/pde* genes whose transcription level in  $\Delta crp$  changed more than 2.5-fold compared to WT. Data are shown as the mean  $\pm$  SD (n=3 independent samples). Two-sided Student's *t*-test was used to analyze the statistical significance (NS: No significance). Source data are provided as a Source Data file.

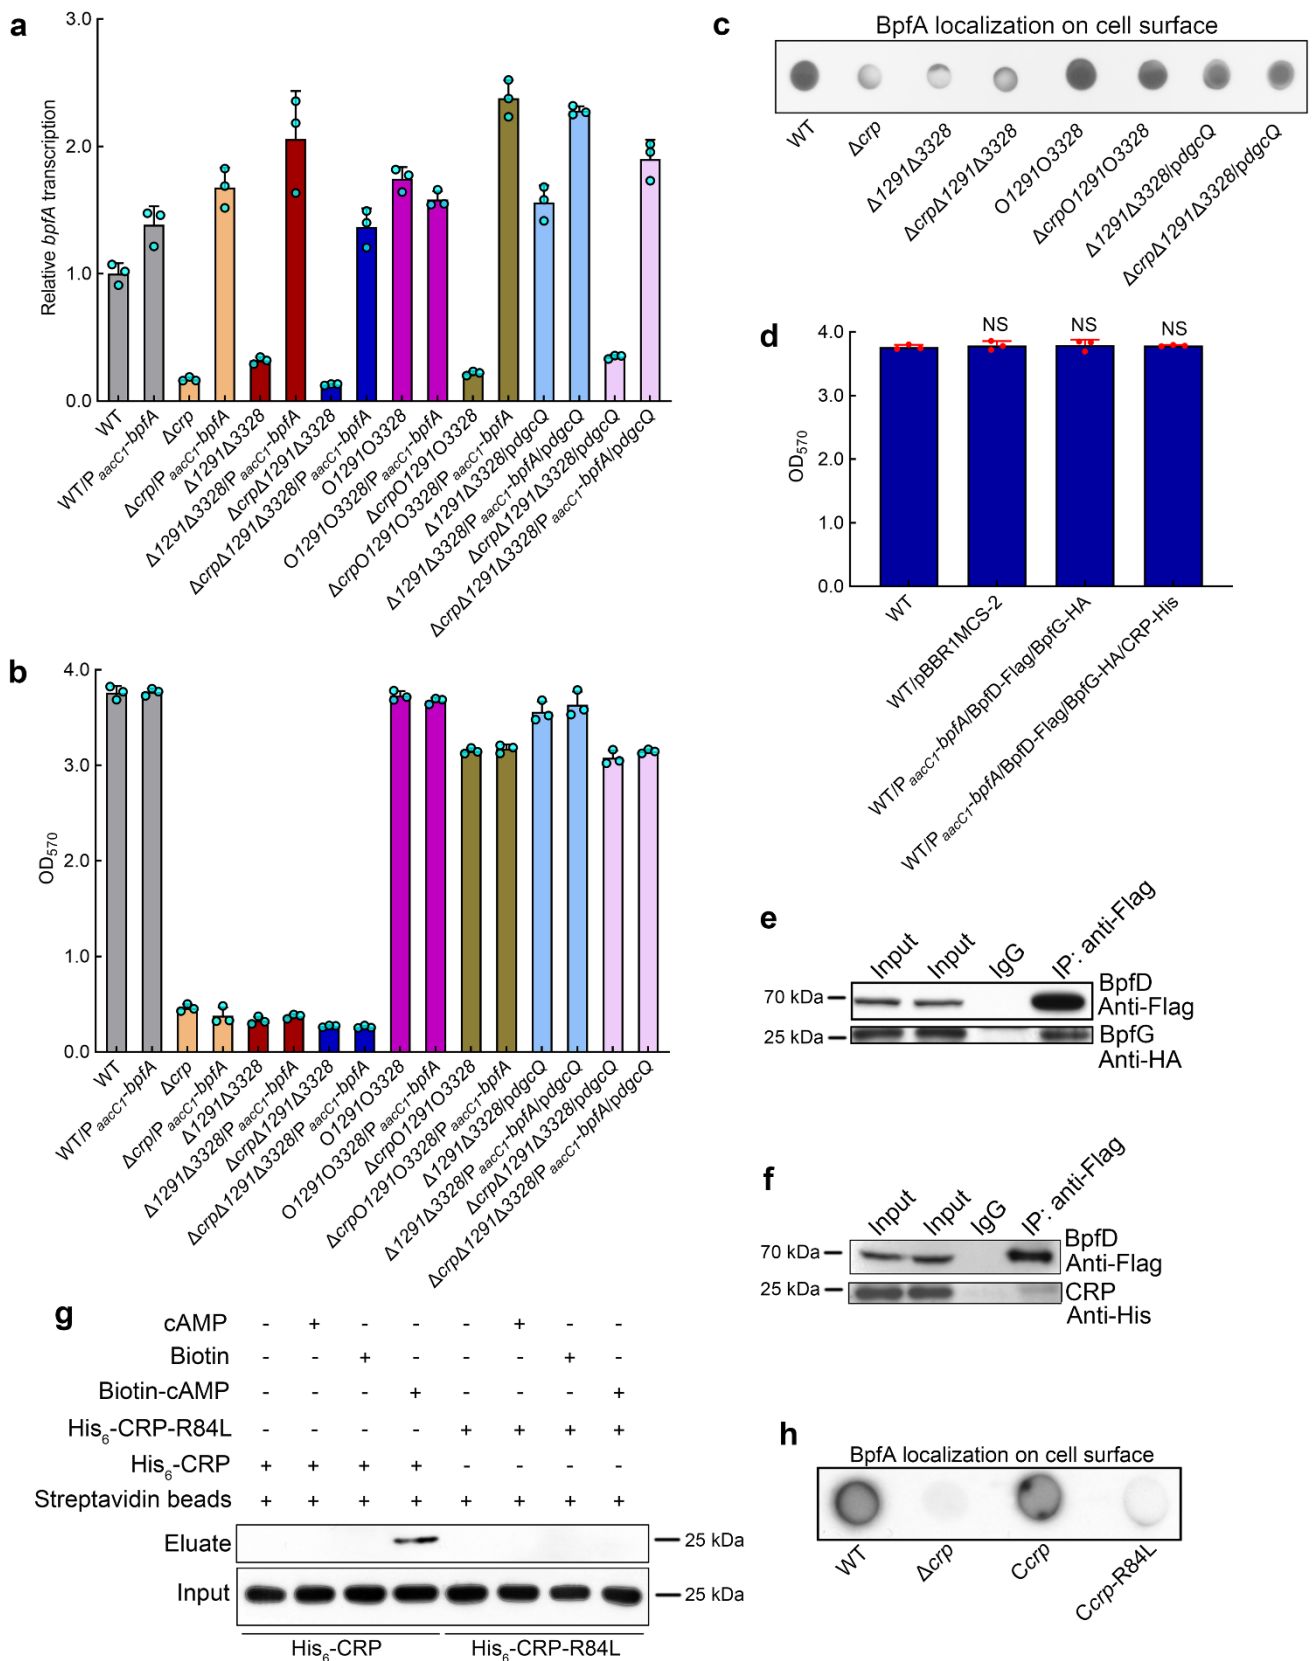

**Supplementary Fig. 3** **a** Comparison of *bpfA* transcription. **b** Biofilm biomass. **c** BpfA localization on the cell surface detected by dot blotting analysis. **d** Biofilm biomass. **e**, **f** Co-IP using antibodies against BpFD, BpFG, CRP, and immunoglobulin G (IgG) negative control. **g** Interaction between cAMP and CRP and CRP-R84L by biotinylated cAMP pull-down assay. **h** BpfA localization on the cell surface detected by dot blotting analysis. Data in **a**, **b**, **d** are shown as the mean  $\pm$  SD ( $n=3$

independent samples). Two-sided Student's  $t$ -test was used in **d** to analyze the statistical significance (NS: No significance). Source data are provided as a Source Data file.

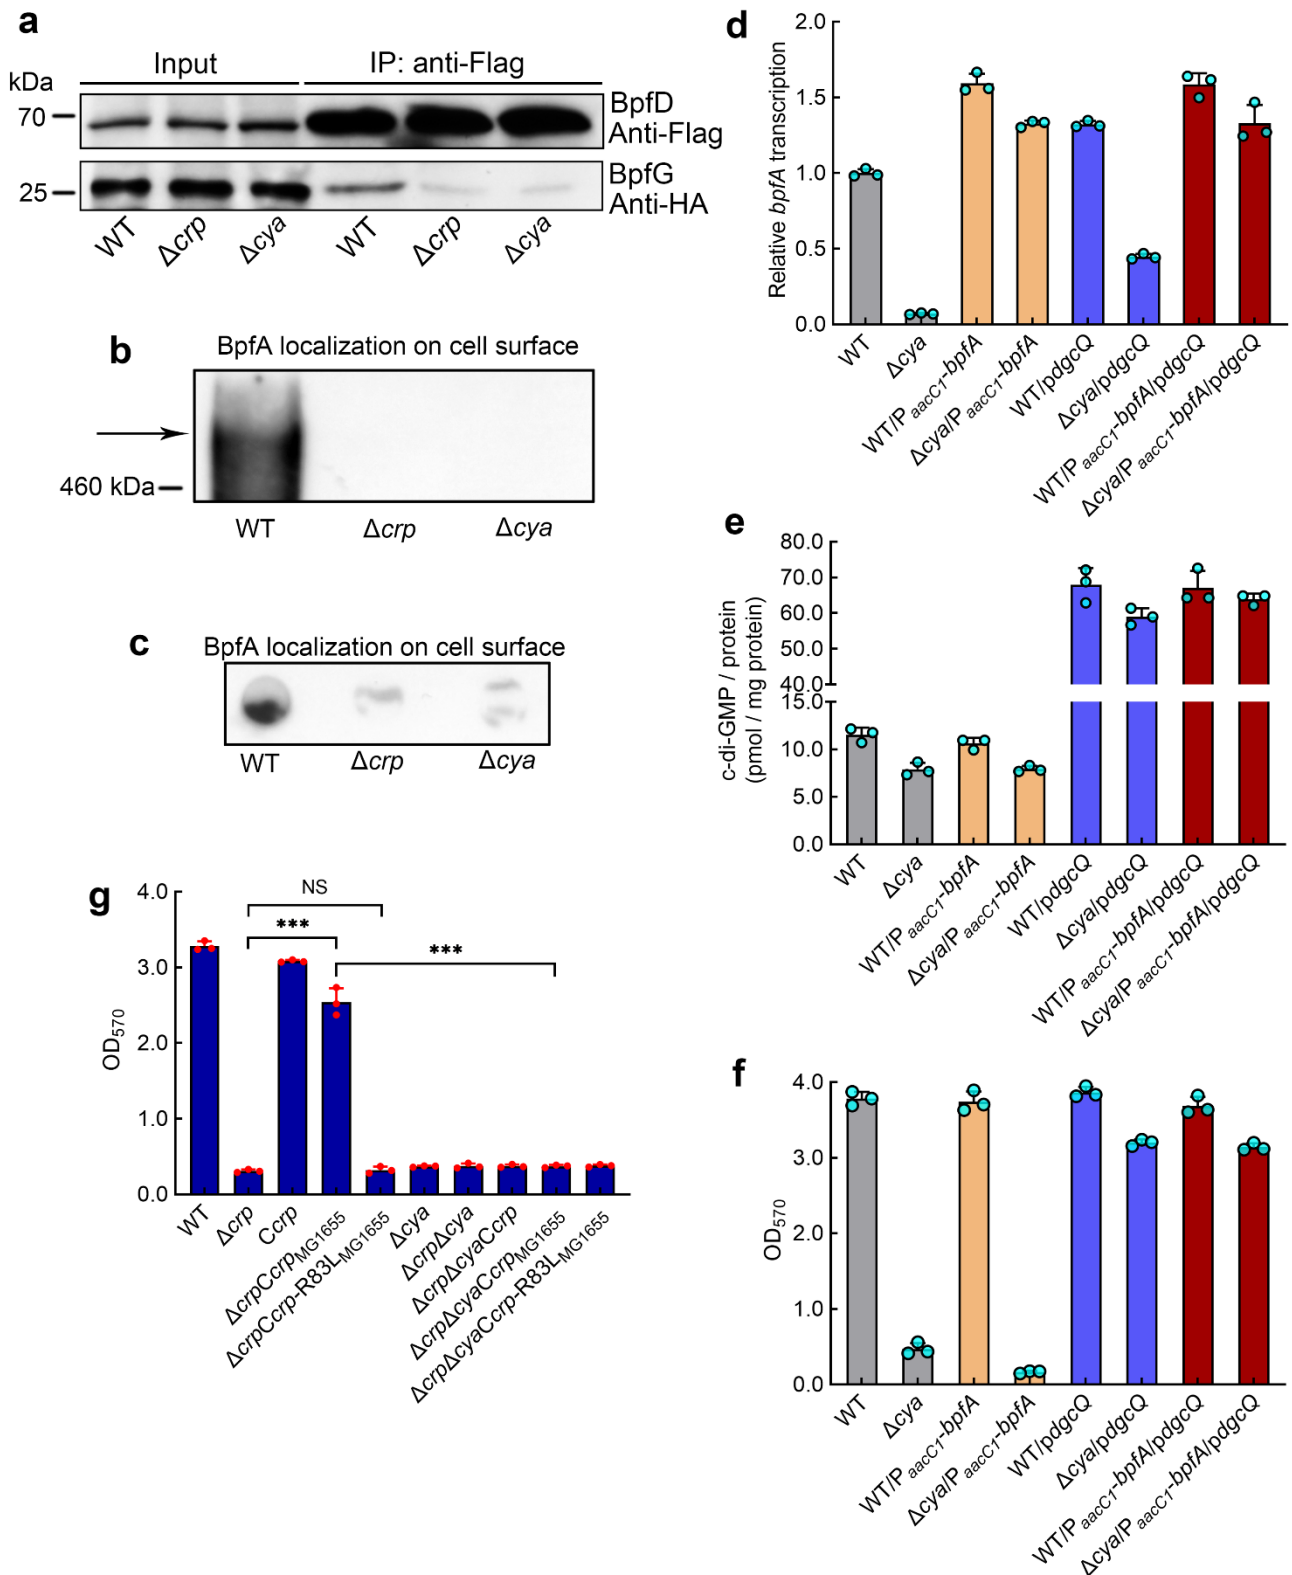

**Supplementary Fig. 4** **a** The interaction between BpfD and BpfG by Co-IP. **b** The BpfA localization on the cell surface detected by western blotting. **c** The BpfA localization on the cell surface detected by dot blotting. The native promoter of the *bpfA* operon in all strains (**a-c**) was replaced by the constitutive promoter P<sub>aacC1</sub>. All strains (**a-c**) were cultured for 30 h in the biofilm state. **d** Transcriptional analysis of *bpfA*. **e** Intracellular c-di-GMP concentration. **f, g** Biofilm biomass. Data

in **d**, **e**, **f**, **g** are shown as the mean  $\pm$  SD (n=3 independent samples). Two-sided Student's *t*-test in **g** was used to analyze the statistical significance (\*\*\*:  $p < 0.001$ , NS: No significance). Source data are provided as a Source Data file.



## Supplementary Tables

Supplementary Table 1 Transcriptional analysis of *dgc* and *pde* genes in WT and  $\Delta$ *crp* at 30 h.

| Gene and enzyme category                   | Fold change | <i>p</i> value |
|--------------------------------------------|-------------|----------------|
| Protein containing a GGDEF domain          |             |                |
| <i>Sputcn32_0384</i>                       | 1.981       | 1.04E-04       |
| <i>Sputcn32_0414</i>                       | 1.846       | 1.81E-04       |
| <i>Sputcn32_0498</i>                       | 2.195       | 1.41E-04       |
| <i>Sputcn32_1039</i>                       | 1.668       | 2.44E-03       |
| <i>Sputcn32_1235</i>                       | 1.886       | 6.16E-05       |
| <i>Sputcn32_1365<sup>b</sup></i>           | 2.676       | 2.64E-04       |
| <i>Sputcn32_1412<sup>b</sup></i>           | 13.332      | 3.72E-06       |
| <i>Sputcn32_1741</i>                       | 1.152       | 3.72E-02       |
| <i>Sputcn32_1934<sup>b</sup></i>           | 3.011       | 1.33E-03       |
| <i>Sputcn32_2096</i>                       | 1.974       | 1.07E-03       |
| <i>Sputcn32_2671</i>                       | 0.978       | 9.03E-01       |
| <i>Sputcn32_3018</i>                       | 1.922       | 6.02E-05       |
| <i>Sputcn32_3085</i>                       | 1.598       | 4.07E-04       |
| <i>Sputcn32_3168</i>                       | 1.443       | 4.81E-02       |
| <i>Sputcn32_3244</i>                       | 1.827       | 5.45E-06       |
| <i>Sputcn32_3269</i>                       | 1.201       | 7.45E-02       |
| <i>Sputcn32_3306</i>                       | 1.222       | 2.33E-02       |
| <i>Sputcn32_3390</i>                       | 2.107       | 6.46E-06       |
| Protein containing an EAL domain           |             |                |
| <i>lrbR<sup>b</sup></i>                    | 7.611       | 3.45E-07       |
| <i>Sputcn32_0601</i>                       | 1.309       | 1.68E-02       |
| <i>Sputcn32_0814</i>                       | 1.651       | 6.08E-04       |
| <i>Sputcn32_1344</i>                       | 2.351       | 7.85E-05       |
| <i>Sputcn32_1988</i>                       | 2.172       | 4.27E-03       |
| <i>Sputcn32_2106</i>                       | 1.376       | 2.26E-03       |
| <i>Sputcn32_2362</i>                       | 1.663       | 7.45E-05       |
| <i>Sputcn32_3141</i>                       | 1.500       | 1.36E-05       |
| Protein containing a dual GGDEF/EAL domain |             |                |
| <i>Sputcn32_0099</i>                       | 1.421       | 3.50E-05       |
| <i>Sputcn32_0133<sup>b</sup></i>           | 2.588       | 3.39E-04       |
| <i>Sputcn32_0327</i>                       | 2.023       | 7.81E-04       |
| <i>Sputcn32_0555</i>                       | 1.868       | 5.47E-04       |
| <i>Sputcn32_0654<sup>b</sup></i>           | 2.529       | 1.74E-04       |
| <i>Sputcn32_1253</i>                       | 1.034       | 5.46E-01       |
| <i>Sputcn32_1800</i>                       | 2.016       | 1.35E-03       |
| <i>Sputcn32_1851</i>                       | 1.276       | 7.53E-04       |
| <i>Sputcn32_1858<sup>b</sup></i>           | 2.746       | 2.78E-03       |
| <i>Sputcn32_1917</i>                       | 0.969       | 4.17E-01       |
| <i>Sputcn32_2456</i>                       | 1.146       | 7.17E-02       |
| <i>Sputcn32_2800</i>                       | 0.890       | 2.06E-03       |
| <i>Sputcn32_2830</i>                       | 1.202       | 4.29E-04       |
| <i>Sputcn32_3319<sup>b</sup></i>           | 4.319       | 4.83E-05       |

|                                   |       |                      |
|-----------------------------------|-------|----------------------|
| <i>Sputcn32_3405</i>              | 1.071 | 1.83E <sup>-01</sup> |
| <i>Sputcn32_3598</i> <sup>b</sup> | 8.402 | 8.89E <sup>-05</sup> |
| <i>Sputcn32_3648</i>              | 0.806 | 4.97E <sup>-03</sup> |
| <i>Sputcn32_3856</i>              | 1.345 | 7.03E <sup>-03</sup> |
| <i>Sputcn32_3917</i>              | 1.202 | 1.14E <sup>-03</sup> |

---

<sup>a</sup> Fold change data indicate the WT/ $\Delta$ *crp* ratios for genes responsible for the expression of proteins involved in the regulation of c-di-GMP. <sup>b</sup> The WT/ $\Delta$ *crp* ratio more than 2.5 folds. The *p* value indicates the level of statistical significance of the differential expression. The statistical significance was determined by two-sided Student's *t*-test.

Supplementary Table 2 Strains and plasmids used in this study.

| Strains and mutants                                                                                     | Usages or Descriptions                                                                                                                                                                                               | Sources    |
|---------------------------------------------------------------------------------------------------------|----------------------------------------------------------------------------------------------------------------------------------------------------------------------------------------------------------------------|------------|
| <i>Escherichia coli</i>                                                                                 |                                                                                                                                                                                                                      |            |
| DH5 $\alpha$                                                                                            | Routine cloning host. <i>fhuA2, lacAU169, phoA, glnV44, <math>\Phi</math>80', lacZAM15, gyrA96, recA1, relA1, endA1, thi-1, hsdR17</i>                                                                               | Lab stock  |
| BL21(DE3)                                                                                               | Protein expression host. <i>dcm, ompT, hsdS (r<sub>B</sub><sup>-</sup>mB<sup>-</sup>) gal</i>                                                                                                                        | Lab stock  |
| UQ3021                                                                                                  | DH5 $\alpha$ / <i>lambda</i> <i>pir</i>                                                                                                                                                                              | Lab stock  |
| UQ3022                                                                                                  | Donor strain for the mini-Tn5 transposon containing plasmid, pRL27                                                                                                                                                   |            |
| BL21(DE3)/pET28a-CRP                                                                                    | Heterologous expression of N-terminal His <sub>6</sub> -tagged <i>S. putrefaciens</i> CN32 CRP protein                                                                                                               | This study |
| BL21(DE3)/pET28a-CRP-R84L                                                                               | Heterologous expression of N-terminal His <sub>6</sub> -tagged <i>S. putrefaciens</i> CN32 site-directed CRP-R84L protein                                                                                            | This study |
| BL21(DE3)/pGEX-4T-1-BpFD-In                                                                             | Heterologous expression of N-terminal GST-tagged BpFD of intracellular domain                                                                                                                                        | This study |
| BL21(DE3)/pGEX-4T-1                                                                                     | Expression of GST protein                                                                                                                                                                                            | This study |
| BL21(DE3)/pMAL-c2x-1291                                                                                 | Heterologous expression of N-terminal MBP-tagged Sputcn32_1291 protein                                                                                                                                               | This study |
| BL21(DE3)/pMAL-c2x-1291-GGAAF                                                                           | Heterologous expression of N-terminal MBP-tagged site-directed Sputcn32_1291GGAAF protein                                                                                                                            | This study |
| <i>Shewanella putrefaciens</i> CN32                                                                     |                                                                                                                                                                                                                      |            |
| Wild type (WT)                                                                                          | <i>Shewanella putrefaciens</i> CN32                                                                                                                                                                                  | 51         |
| WT/pBBR1MCS-2                                                                                           | CN32 carrying plasmid pBBR1MCS-2                                                                                                                                                                                     | This study |
| $\Delta$ <i>crp</i>                                                                                     | CN32 $\Delta$ <i>crp</i> ( <i>Sputcn32_0652</i> )                                                                                                                                                                    | This study |
| <i>Ccrp</i>                                                                                             | CN32 $\Delta$ <i>crp</i> carrying complement pBBR1MCS-2- <i>P<sub>aacC1</sub>-crp</i> ; Km <sup>r</sup>                                                                                                              | This study |
| $\Delta$ <i>crpCcrp</i> <sub>MG1655</sub>                                                               | CN32 $\Delta$ <i>crp</i> carrying complement pBBR1MCS-2- <i>P<sub>aacC1</sub>-crp</i> <sub>MG1655</sub> ; Km <sup>r</sup>                                                                                            | This study |
| $\Delta$ <i>crpCcrp</i> -R83L <sub>MG1655</sub>                                                         | CN32 $\Delta$ <i>crp</i> carrying complement pBBR1MCS-2- <i>P<sub>aacC1</sub>-crp</i> -R83L <sub>MG1655</sub> ; Km <sup>r</sup>                                                                                      | This study |
| $\Delta$ <i>cya</i> ( $\Delta$ <i>cyaA<math>\Delta</math><i>cyaB<math>\Delta</math><i>cyaC</i>)</i></i> | CN32 $\Delta$ <i>cyaA</i> ( <i>Sputcn32_3586</i> ) $\Delta$ <i>cyaB</i> ( <i>Sputcn32_3104</i> ) $\Delta$ <i>cyaC</i> ( <i>Sputcn32_1140</i> )                                                                       | This study |
| <i>Ccya</i> ( <i>CcyaA</i> - <i>CcyaB</i> - <i>CcyaC</i> )                                              | $\Delta$ <i>cya</i> carrying complement pBBR1MCS-2- <i>P<sub>aacC1</sub>-cyaA-cyaB-cyaC</i> ; Km <sup>r</sup>                                                                                                        | This study |
| $\Delta$ <i>crp<math>\Delta</math><i>cya</i></i>                                                        | CN32 $\Delta$ <i>crp<math>\Delta</math><i>cyaA<math>\Delta</math><i>cyaB<math>\Delta</math><i>cyaC</i></i></i></i>                                                                                                   | This study |
| $\Delta$ <i>crp<math>\Delta</math><i>cyaC</i><i>cya</i></i>                                             | CN32 $\Delta$ <i>crp<math>\Delta</math><i>cyaA<math>\Delta</math><i>cyaB<math>\Delta</math><i>cyaC</i> carrying complement pBBR1MCS-2-<i>P<sub>aacC1</sub>-cyaA-cyaB-cyaC</i>; Km<sup>r</sup></i></i></i>            | This study |
| $\Delta$ <i>crp<math>\Delta</math><i>cyaCcrp</i></i>                                                    | CN32 $\Delta$ <i>crp<math>\Delta</math><i>cyaA<math>\Delta</math><i>cyaB<math>\Delta</math><i>cyaC</i> carrying complement pBBR1MCS-2-<i>P<sub>aacC1</sub>-crp</i>; Km<sup>r</sup></i></i></i>                       | This study |
| $\Delta$ <i>crp<math>\Delta</math><i>cyaCcrp</i><sub>MG1655</sub></i>                                   | CN32 $\Delta$ <i>crp<math>\Delta</math><i>cyaA<math>\Delta</math><i>cyaB<math>\Delta</math><i>cyaC</i> carrying complement pBBR1MCS-2-<i>P<sub>aacC1</sub>-crp</i><sub>MG1655</sub>; Km<sup>r</sup></i></i></i>      | This study |
| $\Delta$ <i>crp<math>\Delta</math><i>cyaCcrp</i>-R83L<sub>MG1655</sub></i>                              | CN32 $\Delta$ <i>crp<math>\Delta</math><i>cyaA<math>\Delta</math><i>cyaB<math>\Delta</math><i>cyaC</i> carrying complement pBBR1MCS-2-<i>P<sub>aacC1</sub>-crp</i>-R83L<sub>MG1655</sub>; Km<sup>r</sup></i></i></i> | This study |
| $\Delta$ <i>cpdA</i>                                                                                    | CN32 $\Delta$ <i>cpdA</i> ( <i>Sputcn32_0771</i> )                                                                                                                                                                   | This study |
| <i>CcpdA</i>                                                                                            | CN32 $\Delta$ <i>cpdA</i> carrying complement pBBR1MCS-2- <i>P<sub>aacC1</sub>-cpdA</i> ; Km <sup>r</sup>                                                                                                            | This study |
| $\Delta$ <i>crp<math>\Delta</math><i>cpdA</i></i>                                                       | CN32 $\Delta$ <i>crp<math>\Delta</math><i>cpdA</i></i>                                                                                                                                                               | This study |
| $\Delta$ <i>crp<math>\Delta</math><i>cpdA</i><i>CcpdA</i></i>                                           | CN32 $\Delta$ <i>crp<math>\Delta</math><i>cpdA</i> carrying complement pBBR1MCS-2-<i>P<sub>aacC1</sub>-cpdA</i>; Km<sup>r</sup></i>                                                                                  | This study |
| $\Delta$ <i>bpfA</i>                                                                                    | CN32 $\Delta$ <i>bpfA</i> ( <i>Sputcn32_3591</i> )                                                                                                                                                                   | This study |
| $\Delta$ <i>crp<math>\Delta</math><i>bpfA</i></i>                                                       | CN32 $\Delta$ <i>crp<math>\Delta</math><i>bpfA</i></i>                                                                                                                                                               | This study |
| $\Delta$ <i>cya<math>\Delta</math><i>bpfA</i></i>                                                       | CN32 $\Delta$ <i>cyaA<math>\Delta</math><i>cyaB<math>\Delta</math><i>cyaC<math>\Delta</math><i>bpfA</i></i></i></i>                                                                                                  | This study |

|                                                |                                                                                                                                                                                 |            |
|------------------------------------------------|---------------------------------------------------------------------------------------------------------------------------------------------------------------------------------|------------|
| <i>ΔcrpΔcyaΔbpfA</i>                           | CN32 <i>ΔcrpΔcyaAΔcyaBΔcyaCΔbpfA</i>                                                                                                                                            | This study |
| <i>ΔbpfD</i>                                   | CN32 <i>ΔbpfD(Sputcn32_3597)</i>                                                                                                                                                | This study |
| <i>ΔcrpΔbpfD</i>                               | CN32 <i>ΔcrpΔbpfD</i>                                                                                                                                                           | This study |
| <i>ΔbpfG</i>                                   | CN32 <i>ΔbpfG(Sputcn32_3596)</i>                                                                                                                                                | This study |
| <i>ΔcrpΔbpfG</i>                               | CN32 <i>ΔcrpΔbpfG</i>                                                                                                                                                           | This study |
| WT/ <i>pdgcQ</i>                               | CN32 carrying pBBR1MCS-2- <i>P<sub>aacCI</sub>-dgcQ<sub>MG1655</sub></i> ; Km <sup>r</sup>                                                                                      | This study |
| <i>Δcrp/pdgcQ</i>                              | CN32 <i>Δcrp</i> carrying pBBR1MCS-2- <i>P<sub>aacCI</sub>-dgcQ<sub>MG1655</sub></i> ; Km <sup>r</sup>                                                                          | This study |
| <i>Δcya/pdgcQ</i>                              | CN32 <i>ΔcyaAΔcyaBΔcyaC</i> carrying pBBR1MCS-2- <i>P<sub>aacCI</sub>-dgcQ<sub>MG1655</sub></i> ; Km <sup>r</sup>                                                               | This study |
| <i>Δ0133</i>                                   | CN32 <i>ΔSputcn32_0133</i>                                                                                                                                                      | This study |
| <i>ΔcrpΔ0133</i>                               | CN32 <i>ΔcrpΔSputcn32_0133</i>                                                                                                                                                  | This study |
| <i>ΔlrbR</i>                                   | CN32 <i>ΔlrbR(Sputcn32_0305)</i>                                                                                                                                                | 51         |
| <i>ΔcrpΔlrbR</i>                               | CN32 <i>ΔcrpΔlrbR</i>                                                                                                                                                           | This study |
| <i>Δ0654</i>                                   | CN32 <i>ΔSputcn32_0654</i>                                                                                                                                                      | This study |
| <i>ΔcrpΔ0654</i>                               | CN32 <i>ΔcrpΔSputcn32_0654</i>                                                                                                                                                  | This study |
| <i>Δ1291</i>                                   | CN32 <i>ΔSputcn32_1291</i>                                                                                                                                                      | This study |
| <i>ΔcrpΔ1291</i>                               | CN32 <i>ΔcrpΔSputcn32_1291</i>                                                                                                                                                  | This study |
| <i>Δ1365</i>                                   | CN32 <i>ΔSputcn32_1365</i>                                                                                                                                                      | This study |
| <i>ΔcrpΔ1365</i>                               | CN32 <i>ΔcrpΔSputcn32_1365</i>                                                                                                                                                  | This study |
| <i>Δ1412</i>                                   | CN32 <i>ΔSputcn32_1412</i>                                                                                                                                                      | This study |
| <i>ΔcrpΔ1412</i>                               | CN32 <i>ΔcrpΔSputcn32_1412</i>                                                                                                                                                  | This study |
| <i>Δ1858</i>                                   | CN32 <i>ΔSputcn32_1858</i>                                                                                                                                                      | This study |
| <i>ΔcrpΔ1858</i>                               | CN32 <i>ΔcrpΔSputcn32_1858</i>                                                                                                                                                  | This study |
| <i>Δ1934</i>                                   | CN32 <i>ΔSputcn32_1934</i>                                                                                                                                                      | This study |
| <i>ΔcrpΔ1934</i>                               | CN32 <i>ΔcrpΔSputcn32_1934</i>                                                                                                                                                  | This study |
| <i>Δ3319</i>                                   | CN32 <i>ΔSputcn32_3319</i>                                                                                                                                                      | This study |
| <i>ΔcrpΔ3319</i>                               | CN32 <i>ΔcrpΔSputcn32_3319</i>                                                                                                                                                  | This study |
| <i>Δ3328</i>                                   | CN32 <i>ΔSputcn32_3328</i>                                                                                                                                                      | This study |
| <i>ΔcrpΔ3328</i>                               | CN32 <i>ΔcrpΔSputcn32_3328</i>                                                                                                                                                  | This study |
| <i>Δ3598</i>                                   | CN32 <i>ΔSputcn32_3598</i>                                                                                                                                                      | This study |
| <i>ΔcrpΔ3598</i>                               | CN32 <i>ΔcrpΔSputcn32_3598</i>                                                                                                                                                  | This study |
| <i>Δ1291Δ3328</i>                              | CN32 <i>ΔSputcn32_1291ΔSputcn32_3328</i>                                                                                                                                        | This study |
| <i>Δ1291Δ3328C1291C3328</i>                    | CN32 <i>ΔSputcn32_1291ΔSputcn32_3328</i> carrying complement pBBR1MCS-2- <i>P<sub>aacCI</sub>-Sputcn32_1291- Sputcn32_3328</i> ; Km <sup>r</sup>                                | This study |
| <i>ΔcrpΔ1291Δ3328</i>                          | CN32 <i>ΔcrpΔSputcn32_1291ΔSputcn32_3328</i>                                                                                                                                    | This study |
| <i>ΔcrpΔ1291Δ3328C1291C3328</i>                | CN32 <i>ΔcrpΔSputcn32_1291ΔSputcn32_3328</i> carrying complement pBBR1MCS-2- <i>P<sub>aacCI</sub>-Sputcn32_1291- Sputcn32_3328</i> ; Km <sup>r</sup>                            | This study |
| <i>C1291(GGAAF)C3328(GGAAF)</i>                | CN32 <i>ΔSputcn32_1291ΔSputcn32_3328</i> carrying complement pBBR1MCS-2- <i>P<sub>aacCI</sub>-Sputcn32_1291 (GGDEF→GGAAF)-Sputcn32_3328 (GGEEF→GGAAF)</i> ; Km <sup>r</sup>     | This study |
| <i>ΔcrpΔ1291Δ3328C1291(GGAAF)C3328 (GGAAF)</i> | CN32 <i>ΔcrpΔSputcn32_1291ΔSputcn32_3328</i> carrying complement pBBR1MCS-2- <i>P<sub>aacCI</sub>-Sputcn32_1291 (GGDEF→GGAAF)-Sputcn32_3328 (GGEEF→GGAAF)</i> ; Km <sup>r</sup> | This study |
| <i>Δ1291Δ3328/pdgcQ</i>                        | CN32 <i>ΔSputcn32_1291ΔSputcn32_3328</i> carrying pBBR1MCS-2- <i>P<sub>aacCI</sub>-dgcQ<sub>MG1655</sub></i> ; Km <sup>r</sup>                                                  | This study |
| <i>ΔcrpΔ1291Δ3328/pdgcQ</i>                    | CN32 <i>ΔcrpΔSputcn32_1291ΔSputcn32_3328</i> carrying pBBR1MCS-2- <i>P<sub>aacCI</sub>-dgcQ<sub>MG1655</sub></i> ; Km <sup>r</sup>                                              | This study |
| <i>O1291O3328</i>                              | CN32 carrying pBBR1MCS-2- <i>P<sub>aacCI</sub>-Sputcn32_1291- Sputcn32_3328</i> ;                                                                                               | This study |

|                                                                       |                                                                                                                                                                                                                                 |            |
|-----------------------------------------------------------------------|---------------------------------------------------------------------------------------------------------------------------------------------------------------------------------------------------------------------------------|------------|
|                                                                       | Km <sup>r</sup>                                                                                                                                                                                                                 |            |
| <i>Δcrp</i> O1291O3328                                                | CN32 <i>Δcrp</i> carrying pBBR1MCS-2-P <sub><i>aacC1</i></sub> - <i>Sputcn32_1291-Sputcn32_3328</i> ; Km <sup>r</sup>                                                                                                           | This study |
| <i>Δ1291Δ3328ΔbpfA</i>                                                | CN32 <i>ΔSputcn32_1291ΔSputcn32_3328ΔbpfA</i>                                                                                                                                                                                   | This study |
| <i>ΔcrpΔ1291Δ3328ΔbpfA</i>                                            | CN32 <i>ΔcrpΔSputcn32_1291ΔSputcn32_3328ΔbpfA</i>                                                                                                                                                                               | This study |
| <i>Δ1291Δ3328ΔbpfD</i>                                                | CN32 <i>ΔSputcn32_1291ΔSputcn32_3328ΔbpfD</i>                                                                                                                                                                                   | This study |
| <i>ΔcrpΔ1291Δ3328ΔbpfD</i>                                            | CN32 <i>ΔcrpΔSputcn32_1291ΔSputcn32_3328ΔbpfD</i>                                                                                                                                                                               | This study |
| <i>Δ1291Δ3328ΔbpfG</i>                                                | CN32 <i>ΔSputcn32_1291ΔSputcn32_3328ΔbpfG</i>                                                                                                                                                                                   | This study |
| <i>ΔcrpΔ1291Δ3328ΔbpfG</i>                                            | CN32 <i>ΔcrpΔSputcn32_1291ΔSputcn32_3328ΔbpfG</i>                                                                                                                                                                               | This study |
| <i>ΔbpfA/pdgcQ</i>                                                    | CN32 <i>ΔbpfA</i> carrying pBBR1MCS-2-P <sub><i>aacC1</i></sub> - <i>dgcQ</i> <sub>MG1655</sub> ; Km <sup>r</sup>                                                                                                               | This study |
| <i>ΔcrpΔbpfA/pdgcQ</i>                                                | CN32 <i>ΔcrpΔbpfA</i> carrying pBBR1MCS-2-P <sub><i>aacC1</i></sub> - <i>dgcQ</i> <sub>MG1655</sub> ; Km <sup>r</sup>                                                                                                           | This study |
| <i>Δ1291Δ3328ΔbpfA/pdgcQ</i>                                          | CN32 <i>ΔSputcn32_1291ΔSputcn32_3328ΔbpfA</i> carrying pBBR1MCS-2-P <sub><i>aacC1</i></sub> - <i>dgcQ</i> <sub>MG1655</sub> ; Km <sup>r</sup>                                                                                   | This study |
| <i>ΔcrpΔ1291Δ3328ΔbpfA/pdgcQ</i>                                      | CN32 <i>ΔcrpΔSputcn32_1291ΔSputcn32_3328ΔbpfA</i> carrying pBBR1MCS-2-P <sub><i>aacC1</i></sub> - <i>dgcQ</i> <sub>MG1655</sub> ; Km <sup>r</sup>                                                                               | This study |
| <i>ΔbpfA</i> O1291O3328                                               | CN32 <i>ΔbpfA</i> carrying pBBR1MCS-2-P <sub><i>aacC1</i></sub> - <i>Sputcn32_1291-Sputcn32_3328</i> ; Km <sup>r</sup>                                                                                                          | This study |
| <i>ΔcrpΔbpfA</i> O1291O3328                                           | CN32 <i>ΔcrpΔbpfA</i> carrying pBBR1MCS-2-P <sub><i>aacC1</i></sub> - <i>Sputcn32_1291-Sputcn32_3328</i> ; Km <sup>r</sup>                                                                                                      | This study |
| WT/P <sub><i>aacC1</i></sub> - <i>bpfA</i>                            | CN32 replacing the promoter region of <i>bpfA</i> operon with <i>aacC1</i> promoter                                                                                                                                             | This study |
| <i>Δcrp</i> /P <sub><i>aacC1</i></sub> - <i>bpfA</i>                  | <i>Δcrp</i> replacing the promoter region of <i>bpfA</i> operon with <i>aacC1</i> promoter                                                                                                                                      | This study |
| <i>Δcya</i> /P <sub><i>aacC1</i></sub> - <i>bpfA</i>                  | CN32 <i>ΔcyaAΔcyaBΔcyaC</i> replacing the promoter region of <i>bpfA</i> operon with <i>aacC1</i> promoter                                                                                                                      | This study |
| WT/P <sub><i>aacC1</i></sub> - <i>bpfA</i> /pdgcQ                     | CN32 replacing the promoter region of <i>bpfA</i> operon with <i>aacC1</i> promoter and carrying pBBR1MCS-2-P <sub><i>aacC1</i></sub> - <i>dgcQ</i> <sub>MG1655</sub> ; Km <sup>r</sup>                                         | This study |
| <i>Δcya</i> /P <sub><i>aacC1</i></sub> - <i>bpfA</i> /pdgcQ           | CN32 <i>ΔcyaAΔcyaBΔcyaC</i> replacing the promoter region of <i>bpfA</i> operon with <i>aacC1</i> promoter and carrying pBBR1MCS-2-P <sub><i>aacC1</i></sub> - <i>dgcQ</i> <sub>MG1655</sub> ; Km <sup>r</sup>                  | This study |
| <i>Δ1291Δ3328</i> /P <sub><i>aacC1</i></sub> - <i>bpfA</i> /pdgcQ     | CN32 <i>ΔSputcn32_1291ΔSputcn32_3328</i> replacing the promoter region of <i>bpfA</i> operon with <i>aacC1</i> promoter and carrying pBBR1MCS-2-P <sub><i>aacC1</i></sub> - <i>dgcQ</i> <sub>MG1655</sub> ; Km <sup>r</sup>     | This study |
| <i>ΔcrpΔ1291Δ3328</i> /P <sub><i>aacC1</i></sub> - <i>bpfA</i> /pdgcQ | CN32 <i>ΔcrpΔSputcn32_1291ΔSputcn32_3328</i> replacing the promoter region of <i>bpfA</i> operon with <i>aacC1</i> promoter and carrying pBBR1MCS-2-P <sub><i>aacC1</i></sub> - <i>dgcQ</i> <sub>MG1655</sub> ; Km <sup>r</sup> | This study |
| O1291O3328/P <sub><i>aacC1</i></sub> - <i>bpfA</i>                    | CN32 replacing the promoter region of <i>bpfA</i> operon with <i>aacC1</i> promoter and carrying pBBR1MCS-2-P <sub><i>aacC1</i></sub> - <i>Sputcn32_1291-Sputcn32_3328</i> ; Km <sup>r</sup>                                    | This study |
| <i>Δcrp</i> O1291O3328/P <sub><i>aacC1</i></sub> - <i>bpfA</i>        | CN32 <i>Δcrp</i> replacing the promoter region of <i>bpfA</i> operon with <i>aacC1</i> promoter and carrying pBBR1MCS-2-P <sub><i>aacC1</i></sub> - <i>Sputcn32_1291-Sputcn32_3328</i> ; Km <sup>r</sup>                        | This study |
| WT/BpfA-Flag                                                          | CN32 BpfA with 3×Flag inserted after residue 3700 aa (11100 bp) in the full-length protein of 4220 aa transformant                                                                                                              | This study |
| <i>Δcrp</i> /BpfA-Flag                                                | CN32 <i>Δcrp</i> BpfA with 3×Flag inserted after residue 3700 aa (11100 bp) in the full-length protein of 4220 aa transformant                                                                                                  | This study |
| <i>ΔbpfG</i> /BpfA-Flag                                               | CN32 <i>ΔbpfG</i> BpfA with 3×Flag inserted after residue 3700 aa (11100 bp) in the full-length protein of 4220 aa                                                                                                              | This study |
| <i>ΔcrpΔbpfG</i> /BpfA-Flag                                           | CN32 <i>ΔcrpΔbpfG</i> BpfA with 3×Flag inserted after residue 3700 aa (11100 bp) in the full-length protein of 4220 aa transformant                                                                                             | This study |
| WT/P <sub><i>aacC1</i></sub> - <i>bpfA</i> /BpfA-Flag                 | CN32 replacing the promoter region of <i>bpfA</i> operon with <i>aacC1</i> promoter                                                                                                                                             | This study |

|                                                                                         |                                                                                                                                                                                                                                                                                                                                |            |
|-----------------------------------------------------------------------------------------|--------------------------------------------------------------------------------------------------------------------------------------------------------------------------------------------------------------------------------------------------------------------------------------------------------------------------------|------------|
|                                                                                         | and BpfA with 3×Flag inserted after residue 3700 aa (11100 bp) in the full-length protein of 4220 aa transformant                                                                                                                                                                                                              |            |
| <i>Δcrp</i> /P <sub><i>aacC1</i></sub> - <i>bpfA</i> /BpfA-Flag                         | CN32 <i>Δcrp</i> replacing the promoter region of <i>bpfA</i> operon with <i>aacC1</i> promoter and BpfA with 3×Flag inserted after residue 3700 aa (11100 bp) in the full-length protein of 4220 aa transformant                                                                                                              | This study |
| <i>Ccrp</i> /P <sub><i>aacC1</i></sub> - <i>bpfA</i> /BpfA-Flag                         | CN32 <i>Δcrp</i> replacing the promoter region of <i>bpfA</i> operon with <i>aacC1</i> promoter and BpfA with 3×Flag inserted after residue 3700 aa (11100 bp) in the full-length protein of 4220 aa transformant carrying complement pBBR1MCS-2-P <sub><i>aacC1</i></sub> - <i>crp</i> ; Km <sup>r</sup>                      | This study |
| <i>Ccrp</i> -R84L/P <sub><i>aacC1</i></sub> - <i>bpfA</i> /BpfA-Flag                    | CN32 <i>Δcrp</i> replacing the promoter region of <i>bpfA</i> operon with <i>aacC1</i> promoter and BpfA with 3×Flag inserted after residue 3700 aa (11100 bp) in the full-length protein of 4220 aa transformant carrying complement pBBR1MCS-2-P <sub><i>aacC1</i></sub> - <i>crp</i> -R84L; Km <sup>r</sup>                 | This study |
| <i>Δcya</i> /P <sub><i>aacC1</i></sub> - <i>bpfA</i> /BpfA-Flag                         | CN32 <i>ΔcyaAΔcyaBΔcyaC</i> replacing the promoter region of <i>bpfA</i> operon with <i>aacC1</i> promoter and BpfA with 3×Flag inserted after residue 3700 aa (11100 bp) in the full-length protein of 4220 aa transformant                                                                                                   | This study |
| <i>Δ1291Δ3328</i> /P <sub><i>aacC1</i></sub> - <i>bpfA</i> /BpfA-Flag                   | CN32 <i>Δ1291Δ3328</i> replacing the promoter region of <i>bpfA</i> operon with <i>aacC1</i> promoter and BpfA with 3×Flag inserted after residue 3700 aa (11100 bp) in the full-length protein of 4220 aa transformant                                                                                                        | This study |
| <i>ΔcrpΔ1291Δ3328</i> /P <sub><i>aacC1</i></sub> - <i>bpfA</i> /BpfA-Flag               | CN32 <i>ΔcrpΔ1291Δ3328</i> replacing the promoter region of <i>bpfA</i> operon with <i>aacC1</i> promoter and BpfA with 3×Flag inserted after residue 3700 aa (11100 bp) in the full-length protein of 4220 aa transformant                                                                                                    | This study |
| <i>O1291O3328</i> /P <sub><i>aacC1</i></sub> - <i>bpfA</i> /BpfA-Flag                   | CN32 replacing the promoter region of <i>bpfA</i> operon with <i>aacC1</i> promoter and BpfA with 3×Flag inserted after residue 3700 aa (11100 bp) in the full-length protein of 4220 aa and carrying pBBR1MCS-2-P <sub><i>aacC1</i></sub> - <i>Sputn32_1291-Sputn32_3328</i> transformant; Km <sup>r</sup>                    | This study |
| <i>ΔcrpO1291O3328</i> /P <sub><i>aacC1</i></sub> - <i>bpfA</i> /BpfA-Flag               | CN32 <i>Δcrp</i> replacing the promoter region of <i>bpfA</i> operon with <i>aacC1</i> promoter and BpfA with 3×Flag inserted after residue 3700 aa (11100 bp) in the full-length protein of 4220 aa and carrying pBBR1MCS-2-P <sub><i>aacC1</i></sub> - <i>Sputn32_1291-Sputn32_3328</i> transformant; Km <sup>r</sup>        | This study |
| <i>Δ1291Δ3328</i> /P <sub><i>aacC1</i></sub> - <i>bpfA</i> /BpfA-Flag/ <i>pdgcQ</i>     | CN32 <i>Δ1291Δ3328</i> replacing the promoter region of <i>bpfA</i> operon with <i>aacC1</i> promoter and BpfA with 3×Flag inserted after residue 3700 aa (11100 bp) in the full-length protein of 4220 aa and carrying pBBR1MCS-2-P <sub><i>aacC1</i></sub> - <i>dgcQ</i> <sub>MG1655</sub> transformant; Km <sup>r</sup>     | This study |
| <i>ΔcrpΔ1291Δ3328</i> /P <sub><i>aacC1</i></sub> - <i>bpfA</i> /BpfA-Flag/ <i>pdgcQ</i> | CN32 <i>ΔcrpΔ1291Δ3328</i> replacing the promoter region of <i>bpfA</i> operon with <i>aacC1</i> promoter and BpfA with 3×Flag inserted after residue 3700 aa (11100 bp) in the full-length protein of 4220 aa and carrying pBBR1MCS-2-P <sub><i>aacC1</i></sub> - <i>dgcQ</i> <sub>MG1655</sub> transformant; Km <sup>r</sup> | This study |
| WT/P <sub><i>aacC1</i></sub> - <i>bpfA</i> /BpfD-Flag/BpfG-HA                           | CN32 replacing the promoter region of <i>bpfA</i> operon with <i>aacC1</i> promoter, and with C-terminal 3×Flag-tagged BpfD, and BpfG with 1×HA inserted after residue 221 aa (663 bp) in the full-length protein of 235 aa transformant                                                                                       | This study |
| <i>Δcrp</i> /P <sub><i>aacC1</i></sub> - <i>bpfA</i> /BpfD-Flag/BpfG-HA                 | CN32 <i>Δcrp</i> replacing the promoter region of <i>bpfA</i> operon with <i>aacC1</i> promoter, and with C-terminal 3×Flag-tagged BpfD, and BpfG with 1×HA inserted after residue 221 aa (663 bp) in the full-length protein of 235 aa transformant                                                                           | This study |
| <i>Ccrp</i> /P <sub><i>aacC1</i></sub> - <i>bpfA</i> /BpfD-Flag/BpfG-HA                 | CN32 <i>Δcrp</i> replacing the promoter region of <i>bpfA</i> operon with <i>aacC1</i>                                                                                                                                                                                                                                         | This study |

|                                                                                |                                                                                                                                                                                                                                                                                                                                                              |            |
|--------------------------------------------------------------------------------|--------------------------------------------------------------------------------------------------------------------------------------------------------------------------------------------------------------------------------------------------------------------------------------------------------------------------------------------------------------|------------|
| <i>Ccrp</i> -R84L/ <i>P<sub>aacC1</sub>-bpfA</i> /BpfD-Flag/BpfG-HA            | promoter, and with C-terminal 3×Flag-tagged BpfD, and BpfG with 1×HA inserted after residue 221 aa (663 bp) in the full-length protein of 235 aa transformant carrying complement pBBR1MCS-2- <i>P<sub>aacC1</sub>-crp</i> ; Km <sup>r</sup>                                                                                                                 |            |
|                                                                                | CN32 $\Delta$ <i>crp</i> replacing the promoter region of <i>bpfA</i> operon with <i>aacC1</i> promoter, and with C-terminal 3×Flag-tagged BpfD, and BpfG with 1×HA inserted after residue 221 aa (663 bp) in the full-length protein of 235 aa transformant carrying complement pBBR1MCS-2- <i>P<sub>aacC1</sub>-crp</i> -R84L; Km <sup>r</sup>             | This study |
| $\Delta$ <i>cya</i> / <i>P<sub>aacC1</sub>-bpfA</i> /BpfD-Flag/BpfG-HA         | CN32 $\Delta$ <i>cyaA</i> $\Delta$ <i>cyaB</i> $\Delta$ <i>cyaC</i> replacing the promoter region of <i>bpfA</i> operon with <i>aacC1</i> promoter, and with C-terminal 3×Flag-tagged BpfD, and BpfG with 1×HA inserted after residue 221 aa (663 bp) in the full-length protein of 235 aa transformant                                                      | This study |
| $\Delta$ 1291 $\Delta$ 3328/ <i>P<sub>aacC1</sub>-bpfA</i> /BpfD-Flag/BpfG-HA  | CN32 $\Delta$ 1291 $\Delta$ 3328 replacing the promoter region of <i>bpfA</i> operon with <i>aacC1</i> promoter, and with C-terminal 3×Flag-tagged BpfD, and BpfG with 1×HA inserted after residue 221 aa (663 bp) in the full-length protein of 235 aa transformant                                                                                         | This study |
| <i>Δcrp</i> O1291O3328/ <i>P<sub>aacC1</sub>-bpfA</i> /BpfD-Flag/BpfG-HA       | CN32 $\Delta$ <i>crp</i> replacing the promoter region of <i>bpfA</i> operon with <i>aacC1</i> promoter, and with C-terminal 3×Flag-tagged BpfD, and BpfG with 1×HA inserted after residue 221 aa (663 bp) in the full-length protein of 235 aa, and carrying pBBR1MCS-2- <i>P<sub>aacC1</sub>-Sputcn32_1291-Sputcn32_3328</i> transformant; Km <sup>r</sup> | This study |
| WT/ <i>P<sub>aacC1</sub>-bpfA</i> /BpfD-Flag/BpfG-HA/CRP-His                   | CN32 replacing the promoter region of <i>bpfA</i> operon with <i>aacC1</i> promoter, and with C-terminal 3×Flag-tagged BpfD, and BpfG with 1×HA inserted after residue 221 aa (663 bp) in the full-length protein of 235 aa, and with C-terminal 10×His-tagged CRP transformant.                                                                             | This study |
| $\Delta$ <i>cya</i> / <i>P<sub>aacC1</sub>-bpfA</i> /BpfD-Flag/BpfG-HA/CRP-His | CN32 $\Delta$ <i>cyaA</i> $\Delta$ <i>cyaB</i> $\Delta$ <i>cyaC</i> replacing the promoter region of <i>bpfA</i> operon with <i>aacC1</i> promoter, and with C-terminal 3×Flag-tagged BpfD, and BpfG with 1×HA inserted after residue 221 aa (663 bp) in the full-length protein of 235 aa, and with C-terminal 10×His-tagged CRP transformant.              | This study |
| WT/ <i>P<sub>aacC1</sub>-bpfA</i> /BpfD-Flag/BpfG-HA/CRP-R84L-His              | CN32 replacing the promoter region of <i>bpfA</i> operon with <i>aacC1</i> promoter, and with C-terminal 3×Flag-tagged BpfD, and BpfG with 1×HA inserted after residue 221 aa (663 bp) in the full-length protein of 235 aa, and with C-terminal 10×His-tagged site-directed CRP-R84L transformant.                                                          | This study |
| Plasmids                                                                       |                                                                                                                                                                                                                                                                                                                                                              |            |
| pET-28a(+)                                                                     | Vector for heterologous protein expression in <i>E. coli</i> ; Km <sup>r</sup>                                                                                                                                                                                                                                                                               | Novagen    |
| pK19 <i>mobsacB</i>                                                            | Suicide plasmid for CN32; <i>sacB</i> (modified from <i>B. subtilis</i> ) <i>lacZ</i> ; Km <sup>r</sup>                                                                                                                                                                                                                                                      | 74         |
| pRL27                                                                          | Plasmid containing Mini-Tn5 transposon and a <i>pir</i> protein-dependent DNA replication origin ( <i>oriR6K</i> ); Km <sup>r</sup>                                                                                                                                                                                                                          | 73         |
| pBBR1MCS-2                                                                     | Broad-host-range vector; Km <sup>r</sup>                                                                                                                                                                                                                                                                                                                     | 76         |
| pMAL-c2x                                                                       | Vector for heterologous protein expression in <i>E. coli</i> ; Amp <sup>r</sup>                                                                                                                                                                                                                                                                              | Lab stock  |
| pGEX-4T-1                                                                      | Vector for heterologous protein expression in <i>E. coli</i> ; Amp <sup>r</sup>                                                                                                                                                                                                                                                                              | Lab stock  |
| pRK2013                                                                        | Helper plasmid in matings; Km <sup>r</sup>                                                                                                                                                                                                                                                                                                                   | 75         |

Supplementary Table 3 Primers used in this study.

| Primer            | Sequence (5' to 3')                             | Usage                  |
|-------------------|-------------------------------------------------|------------------------|
| Tn5-seq1          | AACAAGCCAGGGATGTAACG                            | Mini-Tn5 sequence      |
| Tn5-seq2          | CAGCAACACCTTCTTCACGA                            | Mini-Tn5 sequence      |
| <i>crp</i> -5F    | CTCAA <u>AGAATTC</u> TAAGATGAGTCCAATCACTGTGCCC  | <i>crp</i> knock-out   |
| <i>crp</i> -5R    | GTATACTCTAGAGGTACCCGTTAAGTTAGTCTTCAGC           | <i>crp</i> knock-out   |
| <i>crp</i> -3F    | TTTTACTCTAGAGATGTAATAAAGGGTATCTGAATCT           | <i>crp</i> knock-out   |
| <i>crp</i> -3R    | AGGCAGA <u>AGCTTC</u> AGCGAGGTTATCTAAATTAGTGGG  | <i>crp</i> knock-out   |
| <i>crp</i> -UF    | GTTGGATACACCAGTGCGAACAGAC                       | <i>crp</i> knock-out   |
| <i>crp</i> -DR    | TCTAAACTAAGACTTCTATCAAGTT                       | <i>crp</i> knock-out   |
| <i>crp</i> -INF   | CCAATCTCTTGACGAGTGATCTTG                        | <i>crp</i> knock-out   |
| <i>crp</i> -INR   | AAGGTTCTGTTGCCGTATTGATTAA                       | <i>crp</i> knock-out   |
| <i>crp</i> -OF    | CCAGCATGATATGTTCAAGATCTT                        | <i>crp</i> knock-out   |
| <i>crp</i> -OR    | GCAGCACTAAAATCACCAATTTCT                        | <i>crp</i> knock-out   |
| <i>crp</i> -comF  | CGGGATCCAATCAATCGAGGAACATCAACATGG               | <i>crp</i> complement  |
| <i>crp</i> -comR  | CCC <u>AGCTT</u> GCTGAAGACTAACTTAACGGGTACC      | <i>crp</i> complement  |
| <i>cyaA</i> -5F   | TTGATTCTGCAGCGACGTTAAACAGTAAATACCCAG            | <i>cyaA</i> knock-out  |
| <i>cyaA</i> -5R   | GGAATTGGATCCGATGTTACCGACCAAGATGCTGAG            | <i>cyaA</i> knock-out  |
| <i>cyaA</i> -3F   | TTCAAAGGATCCAGCATAGGTATCCATCTCTTGAGGT           | <i>cyaA</i> knock-out  |
| <i>cyaA</i> -3R   | TTTCTAG <u>AATTC</u> AATGCTCTAATGGTGCTAGAAGTGC  | <i>cyaA</i> knock-out  |
| <i>cyaA</i> -UF   | TGTAGATGGCTCTAAGATTGTGATC                       | <i>cyaA</i> knock-out  |
| <i>cyaA</i> -DR   | AGGATGGATCAGCAAGACCTATTTC                       | <i>cyaA</i> knock-out  |
| <i>cyaA</i> -INF  | AATCCTGAACCAGTTGCTGCATT                         | <i>cyaA</i> knock-out  |
| <i>cyaA</i> -INR  | ACCTTGGTGATGTCCATGAGTTAC                        | <i>cyaA</i> knock-out  |
| <i>cyaA</i> -OF   | AATGGTTGGATCTCAGTGAGTTGTG                       | <i>cyaA</i> knock-out  |
| <i>cyaA</i> -OR   | CTTGGCATCCACCTTCTAAGCGAG                        | <i>cyaA</i> knock-out  |
| <i>cyaA</i> -comF | AGACATGGATCCGCCCTAGTTTCCAGTCAAAGATCTTAG         | <i>cyaA</i> complement |
| <i>cyaA</i> -comR | TCCCATGA <u>ATTC</u> GGTGCAAATTAGTACGATTAATAACT | <i>cyaA</i> complement |
| <i>cyaB</i> -5F   | CACTGTCTGCAGGCAATTGGACTTGATGATGTTTGAC           | <i>cyaB</i> knock-out  |
| <i>cyaB</i> -5R   | CTAAAGGGATCCCAAGCACTGAACCTAAGGACATTT            | <i>cyaB</i> knock-out  |
| <i>cyaB</i> -3F   | TGGTGCGGATCCAAAGACTTTCAGGTATCACACTATTC          | <i>cyaB</i> knock-out  |
| <i>cyaB</i> -3R   | CTTATTGA <u>ATTC</u> ATGATGCTGTATTTAGCTGCCAATG  | <i>cyaB</i> knock-out  |
| <i>cyaB</i> -UF   | CGCAATACACAGCAACACGGAGTAT                       | <i>cyaB</i> knock-out  |
| <i>cyaB</i> -UR   | ATGCACCACTGTTATTGTTAGATG                        | <i>cyaB</i> knock-out  |
| <i>cyaB</i> -INF  | CATACATGGCTAATAAGGATTCATC                       | <i>cyaB</i> knock-out  |
| <i>cyaB</i> -INR  | GATAACCTTGAGCATGATTGTTAC                        | <i>cyaB</i> knock-out  |
| <i>cyaB</i> -OF   | TTTCAAAGTGATACGAGGGGATTG                        | <i>cyaB</i> knock-out  |
| <i>cyaB</i> -OR   | CCAAGCCATGTTGATCCTCTCCAC                        | <i>cyaB</i> knock-out  |
| <i>cyaB</i> -comF | GGTTAAGA <u>ATTC</u> TCACCTTTAGTCGGCCGTTATTTG   | <i>cyaB</i> complement |
| <i>cyaB</i> -comR | AGGATT <u>AAGCTT</u> TGATTTTATCCTCGCAAGCATCCT   | <i>cyaB</i> complement |
| <i>cyaC</i> -5F   | AAATTTCTGCAGAGAAGAGCAACTAGGTCATCAATTG           | <i>cyaC</i> knock-out  |
| <i>cyaC</i> -5R   | TCCCCAGGATCCCTCTGATCTTGACTCAATTTAAGCT           | <i>cyaC</i> knock-out  |
| <i>cyaC</i> -3F   | CTGGGGG <u>GATCC</u> CAGTTCTGGTGATTGTGCATATCG   | <i>cyaC</i> knock-out  |



|                     |                                         |                        |
|---------------------|-----------------------------------------|------------------------|
| <i>cyaC</i> -3R     | ATCCATGAATTCAATATCTGTGGATAAGTATGTGAGG   | <i>cyaC</i> knock-out  |
| <i>cyaC</i> -UF     | AGGCTCCTTACCGAGATATAGGAC                | <i>cyaC</i> knock-out  |
| <i>cyaC</i> -DR     | CACTAGCACTTTGGTGATGATTTTC               | <i>cyaC</i> knock-out  |
| <i>cyaC</i> -INF    | TAAGGACGGCATCACCCATGTAAC                | <i>cyaC</i> knock-out  |
| <i>cyaC</i> -INR    | AAACCATATGTCTACGCTAAGGCA                | <i>cyaC</i> knock-out  |
| <i>cyaC</i> -OF     | CTGAATGGCGATTCTGCTCACACTC               | <i>cyaC</i> knock-out  |
| <i>cyaC</i> -OR     | TTTCATTAGGTAAAGGCATTAC                  | <i>cyaC</i> knock-out  |
| <i>cyaC</i> -comF   | AAATTTAAGCTTCACTAGCACTTTGGTGATGATTTTC   | <i>cyaC</i> complement |
| <i>cyaC</i> -comR   | AGTTACCTCGAGAGCTTAAATTGAGTCAAGATCAGAG   | <i>cyaC</i> complement |
| <i>cpdA</i> -5F     | ATGACACTGCAGTTCAGCGCATCAAGTTGTGTAA      | <i>cpdA</i> knock-out  |
| <i>cpdA</i> -5R     | GACCGCGGATCCCGAATGGTATTAAGCACAGCAGC     | <i>cpdA</i> knock-out  |
| <i>cpdA</i> -3F     | GATAATGGATCCGATTCCAGCGGTTATTAACGCGAG    | <i>cpdA</i> knock-out  |
| <i>cpdA</i> -3R     | TGACCAGAATTCTCACGACGCACTGTAACCTCAACA    | <i>cpdA</i> knock-out  |
| <i>cpdA</i> -UF     | GATTTACCAATTACGCCAGTGTA                 | <i>cpdA</i> knock-out  |
| <i>cpdA</i> -DR     | CCGTGAATATAGAGCAGCATAGTT                | <i>cpdA</i> knock-out  |
| <i>cpdA</i> -INF    | ATCCGCGTATTATGTATCTGCATA                | <i>cpdA</i> knock-out  |
| <i>cpdA</i> -INR    | ATAGTGAGTATCAATTGCTGATG                 | <i>cpdA</i> knock-out  |
| <i>cpdA</i> -OF     | GTGTCAAATTGCCTTGATAATAGG                | <i>cpdA</i> knock-out  |
| <i>cpdA</i> -OR     | GTTCTGTGACTTTTAACTCTTCA                 | <i>cpdA</i> knock-out  |
| <i>cpdA</i> -comF   | TAGGGATCCAATTTGGGTATTCAATGTGCTGAA       | <i>cpdA</i> complement |
| <i>cpdA</i> -comR   | TGCGGTCCTCGCGTTAATAAC                   | <i>cpdA</i> complement |
| <i>bpfA</i> -5F     | TTAATGCTGCAGAAGTCAATATAGTTACCCATTGCG    | <i>bpfA</i> knock-out  |
| <i>bpfA</i> -5R     | ATCATCGGATCCGAAGGTGATTTTATATGTTGCATTT   | <i>bpfA</i> knock-out  |
| <i>bpfA</i> -3F     | CATAACGGATCCAATGGCACTATGATCCCTTAAATA    | <i>bpfA</i> knock-out  |
| <i>bpfA</i> -3R     | TCAATTGAATTCAAATGTCCATGTTAAGGCTTGAA     | <i>bpfA</i> knock-out  |
| <i>bpfA</i> -UF     | AAGCCTTAATACCAAGCGATAGAG                | <i>bpfA</i> knock-out  |
| <i>bpfA</i> -DR     | AATGGATCAACTATAACTCGCTGC                | <i>bpfA</i> knock-out  |
| <i>bpfA</i> -INF    | ACCAATGGCAATGTCTTTAGCATC                | <i>bpfA</i> knock-out  |
| <i>bpfA</i> -INR    | TGTAGGTAAAGCTGTCACTGCCAT                | <i>bpfA</i> knock-out  |
| <i>bpfA</i> -OF     | TTAGCACGCGTTGAGCTCGATAA                 | <i>bpfA</i> knock-out  |
| <i>bpfA</i> -OR     | AAATGACATTATCAGCAACCCGAT                | <i>bpfA</i> knock-out  |
| <i>bpfA</i> -QF     | ACCATCGCACCCAATGAGTT                    | <i>bpfA</i> qPCR       |
| <i>bpfA</i> -QR     | CTGCATCGCTGTCATTGTGCG                   | <i>bpfA</i> qPCR       |
| <i>bpfA</i> -EMSA-F | TACAAATAAACATACAACATCTAGT               | <i>bpfA</i> EMSA probe |
| <i>bpfA</i> -EMSA-R | ACCGATCCATAATTAGC                       | <i>bpfA</i> EMSA probe |
| <i>bpfD</i> -5F     | TCGTTTCTGCAGTGTTGATGATATAAACTGTGGGG     | <i>bpfD</i> knock-out  |
| <i>bpfD</i> -5R     | GTTGCTGGATCCTTAGACGTTGTTTAGATCGGACTCCAT | <i>bpfD</i> knock-out  |
| <i>bpfD</i> -3F     | AAAGTAGGATCCCTTAGCGATCCCCAATTTTATGAGT   | <i>bpfD</i> knock-out  |
| <i>bpfD</i> -3R     | AGGTTCGAATTCGAATCCTCTATCACCGACCAAATA    | <i>bpfD</i> knock-out  |
| <i>bpfD</i> -UF     | GCTTAGGTTATGTGCAATTTACTG                | <i>bpfD</i> knock-out  |
| <i>bpfD</i> -DR     | TGCCAGTCACTATCACTTGAATAT                | <i>bpfD</i> knock-out  |
| <i>bpfD</i> -INF    | TCAGTGGTTTATCAATCTCAATCT                | <i>bpfD</i> knock-out  |
| <i>bpfD</i> -INR    | CAAGATCCTTCAGTTCAGTGGTTC                | <i>bpfD</i> knock-out  |
| <i>bpfD</i> -OF     | CTCAACTCTGGTTAAACATTATGG                | <i>bpfD</i> knock-out  |

|                   |                                           |                                             |
|-------------------|-------------------------------------------|---------------------------------------------|
| <i>bpfD</i> -OR   | AAGGTAATACAGATTGACGGTGAT                  | <i>bpfD</i> knock-out                       |
| <i>bpfG</i> -5F   | CAAAAGGAATTCATACTCAATCTGCCTATGCGCAAC      | <i>bpfG</i> knock-out                       |
| <i>bpfG</i> -5R   | ACGTTCTCTAGAGCCATAATGTTAACCAGAGTTGAG      | <i>bpfG</i> knock-out                       |
| <i>bpfG</i> -3F   | AGGCAATCTAGACCTAAATTTAAACTGGAGTAGCCC      | <i>bpfG</i> knock-out                       |
| <i>bpfG</i> -3R   | TGATTTCTGCAGGATCGTGCTCAACATCTGTGACTA      | <i>bpfG</i> knock-out                       |
| <i>bpfG</i> -UF   | GACAATTTACTCTGTGCGATGACAA                 | <i>bpfG</i> knock-out                       |
| <i>bpfG</i> -DR   | CACATAACCTAAGCTTGGGACTAC                  | <i>bpfG</i> knock-out                       |
| <i>bpfG</i> -INF  | ATCTGAAGCAAGTACGTTAGATGA                  | <i>bpfG</i> knock-out                       |
| <i>bpfG</i> -INR  | ACGGTCAACACCTAATCTGTGGTT                  | <i>bpfG</i> knock-out                       |
| <i>bpfG</i> -OF   | CTTTTCGCTGGAGGAAGAGATCTT                  | <i>bpfG</i> knock-out                       |
| <i>bpfG</i> -OR   | TCTTGGTTAATTGTACGGATCAATG                 | <i>bpfG</i> knock-out                       |
| <i>dgcQ</i> -comF | CCAGAAGGATCCTCATAAAAAAGCAGGTTGGGAGTCGTCAG | <i>dgcQ</i> <sub>MG1655</sub> amplification |
| <i>dgcQ</i> -comR | CGCCCCGAATTCCTTAAGCGTTATCGCTCGCGAATACC    | <i>dgcQ</i> <sub>MG1655</sub> amplification |
| 0133-QF           | ATGGCTACGCGCATTATCGAAACC                  | <i>Sputcn32_0133</i> qPCR                   |
| 0133-QR           | CACATCAAGGCCATCCTCTGGGTA                  | <i>Sputcn32_0133</i> qPCR                   |
| 0133-5F           | CTTCGGGAATTCCTGTCTGACACAGGACTCACTTGTT     | <i>Sputcn32_0133</i> knock-out              |
| 0133-5R           | GAAGCTGGATCCGAATGCAGTAATTTCTAAGCGTAAA     | <i>Sputcn32_0133</i> knock-out              |
| 0133-3F           | TGTTTGGGATCCTATTGCTAGATGACTATGATCCGC      | <i>Sputcn32_0133</i> knock-out              |
| 0133-3R           | GCGTTTCTGCAGACTGTGAGCATTGAGGCAAAAGTC      | <i>Sputcn32_0133</i> knock-out              |
| 0133-UF           | AGTTGACCTATGAACATGAACAGT                  | <i>Sputcn32_0133</i> knock-out              |
| 0133-DR           | TGTATGCCATCAACGCTACATCAT                  | <i>Sputcn32_0133</i> knock-out              |
| 0133-INF          | GAATCGAGTCGTATCTGGTACTTT                  | <i>Sputcn32_0133</i> knock-out              |
| 0133-INR          | TTGAGATCACTGAAAAGTATGCTGA                 | <i>Sputcn32_0133</i> knock-out              |
| 0133-OF           | TTTGTGTATTTAAGTCGGCAAAGC                  | <i>Sputcn32_0133</i> knock-out              |
| 0133-OR           | AACAACCTCAAGCCAATATGGTACT                 | <i>Sputcn32_0133</i> knock-out              |
| 0654-QF           | TGGCAGCAGTTGGATCTTGTTTCC                  | <i>Sputcn32_0654</i> qPCR                   |
| 0654-QR           | AAGCGCATTTC AAGCCAGTTCATA                 | <i>Sputcn32_0654</i> qPCR                   |
| 0654-5F           | TGGGCGGAATTCCTATGTGGAACAAGAGGTGCCATC      | <i>Sputcn32_0654</i> knock-out              |
| 0654-5R           | TTGTAAACTAGTGGTAATAGTCTCTAGGGCTCGGTC      | <i>Sputcn32_0654</i> knock-out              |
| 0654-3F           | TGGCTTACTAGTGATATGAACAGTGGTTTACAGCCT      | <i>Sputcn32_0654</i> knock-out              |
| 0654-3R           | AATCGTCTGCAGTAAGCTCGATTCTGCTACGTTGGT      | <i>Sputcn32_0654</i> knock-out              |
| 0654-UF           | CTTTCCTTATCAGTCCTGCTTATT                  | <i>Sputcn32_0654</i> knock-out              |
| 0654-DR           | AATCTCTTGCCCTACGTTCTGTTG                  | <i>Sputcn32_0654</i> knock-out              |
| 0654-INF          | TCTGAGTGTTGTGATTGGAGTAAT                  | <i>Sputcn32_0654</i> knock-out              |
| 0654-INR          | TCAGCTATCATCACCAGCGTATTT                  | <i>Sputcn32_0654</i> knock-out              |
| 0654-OF           | ATGGCAGTGCTGATGCTCAATTTT                  | <i>Sputcn32_0654</i> knock-out              |
| 0654-OR           | TTCTTGACTCCATAATCGAATACA                  | <i>Sputcn32_0654</i> knock-out              |
| 1291-QF           | AGCGGATCGATGAGGCATTACCAG                  | <i>Sputcn32_1291</i> qPCR                   |
| 1291-QR           | GCTAATCCCCTCGACTTTCTTCCG                  | <i>Sputcn32_1291</i> qPCR                   |
| 1291-5F           | ACCTCTCTGCAGGCGGGATTATCAATGATAATTTGA      | <i>Sputcn32_1291</i> knock-out              |
| 1291-5R           | AGGGTTGGATCCGTGATTGACGTATAGTTAAGACCG      | <i>Sputcn32_1291</i> knock-out              |
| 1291-3F           | AATAAAGGATCCTTGGAGTAGTGTGTTGTAACCTGGC     | <i>Sputcn32_1291</i> knock-out              |
| 1291-3R           | GAGCAGGAATTCCTCAACTCAAGCTTGAACCTAGCCTG    | <i>Sputcn32_1291</i> knock-out              |
| 1291-UF           | GTGAGCAGTTACGATACAGTTGAT                  | <i>Sputcn32_1291</i> knock-out              |

|                           |                                       |                                       |
|---------------------------|---------------------------------------|---------------------------------------|
| 1291-DR                   | ATCGACTTCACAGCTAATCTGGAC              | <i>Sputcn32_1291</i> knock-out        |
| 1291-INF                  | CTTCGGTACTGAGTTCATTGAGTT              | <i>Sputcn32_1291</i> knock-out        |
| 1291-INR                  | ATTACAGCAGCAATTTAGCGAATC              | <i>Sputcn32_1291</i> knock-out        |
| 1291-OF                   | TGTTCCATACCTTGTTTCATTACC              | <i>Sputcn32_1291</i> knock-out        |
| 1291-OR                   | AGCAGATCATTGAATTAAGTTCAC              | <i>Sputcn32_1291</i> knock-out        |
| 1291-comF                 | CACAGCTCTAGATAATCTGGACATAGGATCGTCATG  | <i>Sputcn32_1291</i> complement       |
| 1291-comR                 | GCGTATGGATCCAGTCGGTCTTAACCTATACGTCAAT | <i>Sputcn32_1291</i> complement       |
| 1291-GGAAF-F <sup>a</sup> | GCTACGGCGGTGCGGCGTTTGTCTCTTAC         | <i>Sputcn32_1291</i> site mutagenesis |
| 1291-GGAAF-R <sup>a</sup> | GTGCAACAAATTCTGTATCTCGTAGGGAGT        | <i>Sputcn32_1291</i> site mutagenesis |
| 1365-QF                   | TTACTCACGCCACTGACACCGTCA              | <i>Sputcn32_1365</i> qPCR             |
| 1365-QR                   | CAAACATCGCCTGCGTTGACATTT              | <i>Sputcn32_1365</i> qPCR             |
| 1365-5F                   | GGGCATGAATTCCTCAAGTGCACCTTTATTGGATGT  | <i>Sputcn32_1365</i> knock-out        |
| 1365-5R                   | AAGGCAGGATCCTCAGGTCGCAATGGTTATAAACTA  | <i>Sputcn32_1365</i> knock-out        |
| 1365-3F                   | GCAGGCGGATCCAAAGACTGTCCGAGGATCTAAACT  | <i>Sputcn32_1365</i> knock-out        |
| 1365-3R                   | ATAAGCCTGCAGCGAAGCCAATACACCTCATCCATA  | <i>Sputcn32_1365</i> knock-out        |
| 1365-UF                   | TTTGTGTAGAGGATGAGGCTGTTG              | <i>Sputcn32_1365</i> knock-out        |
| 1365-DR                   | GAACTTACAACCTTAACCAACTGAT             | <i>Sputcn32_1365</i> knock-out        |
| 1365-INF                  | TCAGCCTCTAGAATATCGTTAGAC              | <i>Sputcn32_1365</i> knock-out        |
| 1365-INR                  | TTGGCCATAAATGCGGTGACTATA              | <i>Sputcn32_1365</i> knock-out        |
| 1365-OF                   | GACAGATCCAGCCGTTAATGCAGG              | <i>Sputcn32_1365</i> knock-out        |
| 1365-OR                   | AGAATAACACCGACACAATTGAGC              | <i>Sputcn32_1365</i> knock-out        |
| 1412-QF                   | ATTCCGAGCCATGAGCCATTGTTC              | <i>Sputcn32_1412</i> qPCR             |
| 1412-QR                   | GGTTCGCAAGTCCCGTTAGTGAGT              | <i>Sputcn32_1412</i> qPCR             |
| 1412-5F                   | TTCATCCTGCAGTACGGCATTATATGGACAGTGGA   | <i>Sputcn32_1412</i> knock-out        |
| 1412-5R                   | GATGGTGGATCCC GCGACCGAATTAATACATCACTT | <i>Sputcn32_1412</i> knock-out        |
| 1412-3F                   | AATAAAGGATCCGAGTTCAATGGTCTGGAGGGAAGA  | <i>Sputcn32_1412</i> knock-out        |
| 1412-3R                   | CCCTTCGAATTCATCATGTGATAAATCGCTGTGTC   | <i>Sputcn32_1412</i> knock-out        |
| 1412-UF                   | ACTGGCATACTGGTAAATATGGCC              | <i>Sputcn32_1412</i> knock-out        |
| 1412-UR                   | ACAATCCGCTTTATCCATTGTCGA              | <i>Sputcn32_1412</i> knock-out        |
| 1412-INF                  | GCACTGACAGAGACATAGTCACGT              | <i>Sputcn32_1412</i> knock-out        |
| 1412-INR                  | GATGAAATACTGCAACACTATTGG              | <i>Sputcn32_1412</i> knock-out        |
| 1412-OF                   | TTTGCTTGAGTAATGACGGTATTT              | <i>Sputcn32_1412</i> knock-out        |
| 1412-OR                   | GAATGCTTATCGATGCTAATACAA              | <i>Sputcn32_1412</i> knock-out        |
| 1858-QF                   | TGGCCGATCAGCTTGCATTAACCC              | <i>Sputcn32_1858</i> qPCR             |
| 1858-QR                   | CTGTTGCACTGCGAAATAGGCTTA              | <i>Sputcn32_1858</i> qPCR             |
| 1858-5F                   | CGATGGGAATTCCTGAAGCTCTGAGTAATTGTGATT  | <i>Sputcn32_1858</i> knock-out        |
| 1858-5R                   | TTTAGGGGATCCTCTATGGATATCTTGAACATCAT   | <i>Sputcn32_1858</i> knock-out        |
| 1858-3F                   | AATCGTGGATCCTCTTCTGTACTGACACATTGAATG  | <i>Sputcn32_1858</i> knock-out        |
| 1858-3R                   | GCGCCACTGCAGTAGATACTGGCTATTATCTAGTGC  | <i>Sputcn32_1858</i> knock-out        |
| 1858-UF                   | AAAGTCAATCTCTCGTAGCACAAT              | <i>Sputcn32_1858</i> knock-out        |
| 1858-DR                   | TCGATGCAATCTATGAACATTGAG              | <i>Sputcn32_1858</i> knock-out        |
| 1858-INF                  | AATGGACATCTTGAAGGTGTTCTC              | <i>Sputcn32_1858</i> knock-out        |
| 1858-INR                  | ACTCTCGAAATGACTACCAATGC               | <i>Sputcn32_1858</i> knock-out        |
| 1858-OF                   | TTATCCTATTTGAACCTGTTGTT               | <i>Sputcn32_1858</i> knock-out        |

|                           |                                        |                                       |
|---------------------------|----------------------------------------|---------------------------------------|
| 1858-OR                   | CGTTTGAATCTGTAGATCGATTA                | <i>Sputcn32_1858</i> knock-out        |
| 1934-QF                   | GTTTATCCAGCAGACTGAACGGCG               | <i>Sputcn32_1934</i> qPCR             |
| 1934-QR                   | GGGTAAGCCATCAACACCGAGATC               | <i>Sputcn32_1934</i> qPCR             |
| 1934-5F                   | AGTTAAGAATTCAGCATTGGAACCAGAGACTAAAGT   | <i>Sputcn32_1934</i> knock-out        |
| 1934-5R                   | CGGTTCCGGATCCTCCTTCGCTATCCACATATTGATA  | <i>Sputcn32_1934</i> knock-out        |
| 1934-3F                   | AGTGGGGGATCCGGACGATGTTACCGTATTTCTTGA   | <i>Sputcn32_1934</i> knock-out        |
| 1934-3R                   | CGACGCCTGCAGATGGCTTCGTTATAGGTCATTCGC   | <i>Sputcn32_1934</i> knock-out        |
| 1934-UF                   | CTTAATTGTGATCTTGTGCAGCTA               | <i>Sputcn32_1934</i> knock-out        |
| 1934-DR                   | CAATAATGACTGCGCATCTAACTC               | <i>Sputcn32_1934</i> knock-out        |
| 1934-INF                  | ATTGCTGATGTTGATGCTTATCTT               | <i>Sputcn32_1934</i> knock-out        |
| 1934-INR                  | TAAGCCATCAACACCGAGATCAAC               | <i>Sputcn32_1934</i> knock-out        |
| 1934-OF                   | CAATGCTGTAGATTTGAATCGGCG               | <i>Sputcn32_1934</i> knock-out        |
| 1934-OR                   | AAGTAAATCTGCAATGTCCACCAG               | <i>Sputcn32_1934</i> knock-out        |
| 3319-QF                   | AATCATGCCGTTAGCGAGGTCATG               | <i>Sputcn32_3319</i> qPCR             |
| 3319-QR                   | TTGCTGTGCCACGGTATTTGCACT               | <i>Sputcn32_3319</i> qPCR             |
| 3319-5F                   | GTAAGGAATTCGTCATACTCTCAACAGTTTGCTT     | <i>Sputcn32_3319</i> knock-out        |
| 3319-5R                   | ACAGAGGGATCCGGTTTCGAGTTCACTGAGTTTACC   | <i>Sputcn32_3319</i> knock-out        |
| 3319-3F                   | AATGCAGGATCCCTCAATCCACACGCATTAATCGCT   | <i>Sputcn32_3319</i> knock-out        |
| 3319-3R                   | GTCTGGCTGCAGGGAGATAAACCAATCGCACTGGC    | <i>Sputcn32_3319</i> knock-out        |
| 3319-UF                   | TTCTAAGTCATAGACTCCGCAAAC               | <i>Sputcn32_3319</i> knock-out        |
| 3319-DR                   | GTTAGAGAATGATAAAGTGATCGT               | <i>Sputcn32_3319</i> knock-out        |
| 3319-INF                  | GATATTCTGGCTTAAGACTCTGGT               | <i>Sputcn32_3319</i> knock-out        |
| 3319-INR                  | CATTGGCTTCTATCTGCAGTACCT               | <i>Sputcn32_3319</i> knock-out        |
| 3319-OF                   | ACCATAATCAGTGCTATAACCTAA               | <i>Sputcn32_3319</i> knock-out        |
| 3319-OR                   | ACATTATCATAGAGAGAAGATTGC               | <i>Sputcn32_3319</i> knock-out        |
| 3328-QF                   | TTGGTGCCAGTATTGGCGTTGCTT               | <i>Sputcn32_3328</i> qPCR             |
| 3328-QR                   | CTTGGCGCGGTACATCGCAATATC               | <i>Sputcn32_3328</i> qPCR             |
| 3328-5F                   | CTCGATGAATTCATATCAACTATCGGTTCAAGTGAC   | <i>Sputcn32_3328</i> knock-out        |
| 3328-5R                   | GAGTTTGGATCCTGTACGGCTCGCAATTGTAATATT   | <i>Sputcn32_3328</i> knock-out        |
| 3328-3F                   | TACGGTGGATCCTTGGTCTTGAGTCATCGCATTGAG   | <i>Sputcn32_3328</i> knock-out        |
| 3328-3R                   | GATGCGCTGCAGCGGCAGTTAATTGAGGATATGTTT   | <i>Sputcn32_3328</i> knock-out        |
| 3328-UF                   | TGCATGGATTTCGAGGAATGATTGC              | <i>Sputcn32_3328</i> knock-out        |
| 3328-DR                   | TAATCGATGATGATGAAGTGGATA               | <i>Sputcn32_3328</i> knock-out        |
| 3328-INF                  | AATACTTGTAATCATCATCCGTCA               | <i>Sputcn32_3328</i> knock-out        |
| 3328-INR                  | AACTGGGTGCTCAGGATTTCTTAC               | <i>Sputcn32_3328</i> knock-out        |
| 3328-OF                   | ATCCATTAAGCAATGATTGGCCTA               | <i>Sputcn32_3328</i> knock-out        |
| 3328-OR                   | GCTACTCGATGGATTATTAATGTT               | <i>Sputcn32_3328</i> knock-out        |
| 3328-comF                 | AAGGTTGGATCCACTGGCGTATTGTTGAGCTTCCAT   | <i>Sputcn32_3328</i> complement       |
| 3328-comR                 | TACAGGCTCGAGAATGACCACTGGATAAGGTTTCCACA | <i>Sputcn32_3328</i> complement       |
| 3328-GGAAF-F <sup>a</sup> | TTTAGGGGGCGCGCGTTTGTGTCCTGGT           | <i>Sputcn32_3328</i> site mutagenesis |
| 3328-GGAAF-R <sup>a</sup> | CGAGCAATGACATCACCATCCCGCAGAACC         | <i>Sputcn32_3328</i> site mutagenesis |
| 3598-QF                   | AGAGCAAGCGATACAACAGCGCAC               | <i>Sputcn32_3598</i> qPCR             |
| 3598-QR                   | TTGTAGACGTTTCAGCTCTGCGCCT              | <i>Sputcn32_3598</i> qPCR             |
| 3598-5F                   | TAGCGCTGCAGCGCATATAGTATGGACAAATAGCC    | <i>Sputcn32_3598</i> knock-out        |

|                                                           |                                                          |                                                                 |
|-----------------------------------------------------------|----------------------------------------------------------|-----------------------------------------------------------------|
| 3598-5R                                                   | GGTTTGGGATCCTTACACGACTAATACACCAGTCATTAT                  | <i>Sputcn32_3598</i> knock-out                                  |
| 3598-3F                                                   | GCAACAGGATCCAGATTGTGCTTAAACTAAATGTACGAT                  | <i>Sputcn32_3598</i> knock-out                                  |
| 3598-3R                                                   | TACGAAGAATTCGATTATCTATACGAAACTAGCACC                     | <i>Sputcn32_3598</i> knock-out                                  |
| 3598-UF                                                   | ACAACCTGATCTCCGCTGACAACCT                                | <i>Sputcn32_3598</i> knock-out                                  |
| 3598-DR                                                   | GAAGACAATATCGATGAGGAGCGT                                 | <i>Sputcn32_3598</i> knock-out                                  |
| 3598-INF                                                  | AGAACTTAGCCAAGCCTACGATAA                                 | <i>Sputcn32_3598</i> knock-out                                  |
| 3598-INR                                                  | AGTTCCTGGATGCTTATTACCTAG                                 | <i>Sputcn32_3598</i> knock-out                                  |
| 3598-OF                                                   | TACTTATCATGCTAACCTAAAAGC                                 | <i>Sputcn32_3598</i> knock-out                                  |
| 3598-OR                                                   | GCTATGTCATCTTTGTATCAGTTT                                 | <i>Sputcn32_3598</i> knock-out                                  |
| <i>P<sub>bpfA</sub></i> -5F                               | TTTTATGGATCCGCAGTATTCCAAGTACTTGAATGGT                    | Replacing <i>P<sub>bpfA</sub></i> with <i>P<sub>aacCI</sub></i> |
| <i>P<sub>bpfA</sub></i> -3R                               | GATGGTGAATTCACGGTAAAGCTGTCGGTGCCATT                      | Replacing <i>P<sub>bpfA</sub></i> with <i>P<sub>aacCI</sub></i> |
| <i>P<sub>aacCI</sub></i> -F                               | GGACTAGTGAATTGACATAAGCCTGTTCGGTTC                        | Replacing <i>P<sub>bpfA</sub></i> with <i>P<sub>aacCI</sub></i> |
| <i>P<sub>aacCI</sub></i> -R <sup>a</sup>                  | CGTTGCTGCTCCATAACATCAAAC                                 | Replacing <i>P<sub>bpfA</sub></i> with <i>P<sub>aacCI</sub></i> |
| <i>P<sub>bpfA</sub></i> - <i>aacCI</i> -KinF <sup>a</sup> | ATGGGATCGGTCATTACATCAAAAAAGGT                            | Replacing <i>P<sub>bpfA</sub></i> with <i>P<sub>aacCI</sub></i> |
| <i>P<sub>bpfA</sub></i> - <i>aacCI</i> -KinR              | GGACTAGTCTATCGCTTGGTATTAAGGCTTTTTCTTGC                   | Replacing <i>P<sub>bpfA</sub></i> with <i>P<sub>aacCI</sub></i> |
| <i>P<sub>bpfA</sub></i> - <i>aacCI</i> -SF                | TAGCTCCTTATCCTTCCTCATATC                                 | Replacing <i>P<sub>bpfA</sub></i> with <i>P<sub>aacCI</sub></i> |
| <i>P<sub>bpfA</sub></i> - <i>aacCI</i> -SR                | CATCGAAGGTGATTTTCATATGTTG                                | Replacing <i>P<sub>bpfA</sub></i> with <i>P<sub>aacCI</sub></i> |
| Flag-F                                                    | CCGCTCGAGGGAGGTGGCGATTACAAGGATGAC                        | <i>flag</i> amplification                                       |
| Flag <sub><i>bpfA</i></sub> -R                            | GGGGATCCGCCACCTCCTTTATCGTCATCATCTTTGTAGTC                | <i>flag</i> amplification                                       |
| Flag <sub><i>bpfD</i></sub> -R                            | GGGGATCCTTTATCGTCATCATCTTTGTAGTC                         | <i>flag</i> amplification                                       |
| CRP-C5F                                                   | TTTCACGGATCCCTTACTTACCTCACCTCAAAGCGA                     | CRP C-terminal 10×His knock-in                                  |
| CRP-C3R                                                   | TCAAATGAATTC AAGATGAGTCCAATCACTGTGCC                     | CRP C-terminal 10×His knock-in                                  |
| CRP-CSF                                                   | GCAAATCAAGATCACTCGTCAAGA                                 | CRP C-terminal 10×His knock-in                                  |
| CRP-CSR                                                   | ATTATTGTTGGATACACCAGTGCG                                 | CRP C-terminal 10×His knock-in                                  |
| CRP-COF                                                   | CAAAACCCATTGTCTGTATTTCAC                                 | CRP C-terminal 10×His knock-in                                  |
| CRP-COR                                                   | GGCGCAACATGGACTCAAAT                                     | CRP C-terminal 10×His knock-in                                  |
| CRP-His <sub>10</sub> KinF <sup>a</sup>                   | CATCATCATCATCATTAAGTTAGTCTTCAGCTTGATTTAAGCCTG<br>TTTCATT | CRP C-terminal 10×His knock-in                                  |
| CRP-His <sub>10</sub> KinR <sup>a</sup>                   | ATGATGATGATGATGACGGGTACCGTATACCACTATGGTTTTGCC<br>GTGTGCT | CRP C-terminal 10×His knock-in                                  |
| BpfA-C520-5F                                              | AATTTAGAAATTCGGTTCTATAGCCTATGTTGAATTATC                  | BpfA C-terminal 520 aa 3×Flag knock-in                          |
| BpfA-C520-3R                                              | ATTAGCCTGCAGCAATAATAGGCCGTTACTATCAAC                     | BpfA C-terminal 520 aa 3×Flag knock-in                          |
| BpfA-C520-SF                                              | TGATGGTCCAGATAACGATACAGG                                 | BpfA C-terminal 520 aa 3×Flag knock-in                          |
| BpfA-C520-SR                                              | ATCCATTACCAGCAACCATACGAA                                 | BpfA C-terminal 520 aa 3×Flag knock-in                          |
| BpfA-C520-OF                                              | AAGCCTATGATGAGCAAGGTAATT                                 | BpfA C-terminal 520 aa 3×Flag knock-in                          |
| BpfA-C520-OR                                              | TGCCACCATTTACAATATCCGCTT                                 | BpfA C-terminal 520 aa 3×Flag knock-in                          |
| BpfA-C520-FlagKinF                                        | CGGGATCCAACGAAACACCTAATACAAATGACCCAATA                   | BpfA C-terminal 520 aa 3×Flag knock-in                          |

|                             |                                                                    |                                                                                              |
|-----------------------------|--------------------------------------------------------------------|----------------------------------------------------------------------------------------------|
| BpfA-C520-FlagKinR          | CCG <u>CTCGAGATGGCTAAAGTTGAGAGTTAACGTTACAGG</u>                    | BpfA C-terminal 520 aa 3×Flag knock-in                                                       |
| BpfD-C5F                    | TATGAGGA <u>AATTC</u> CCAGTGGCAATTAACCTAACACAC                     | BpfD C-terminal 3×Flag knock-in                                                              |
| BpfD-C3R                    | GGTGAT <u>CTGCAGTAGCGCAGTCCGGTAGCGCATCTG</u>                       | BpfD C-terminal 3×Flag knock-in                                                              |
| BpfD-CSF                    | ATTACGATGAAGCACAGCATAACA                                           | BpfD C-terminal 3×Flag knock-in                                                              |
| BpfD-CSR                    | TATAGATAGGGTGGAGAGTCGTAA                                           | BpfD C-terminal 3×Flag knock-in                                                              |
| BpfD-COF                    | TACATTGAATTATTATCGCTTGGTGC                                         | BpfD C-terminal 3×Flag knock-in                                                              |
| BpfD-COR                    | GACCAAATTCTTCGCATAACTAGC                                           | BpfD C-terminal 3×Flag knock-in                                                              |
| BpfD-FlagKinF               | CGGGAT <u>CCTAAATCAGTCGTGAAGCTCCTTCGGGAGCT</u>                     | BpfD C-terminal 3×Flag knock-in                                                              |
| BpfD-FlagKinR               | CCG <u>CTCGAGTTCTAGATTTTCTGGTGGCGCAATAAATCC</u>                    | BpfD C-terminal 3×Flag knock-in                                                              |
| BpfG-C14-5F                 | TATGGCGA <u>AATTC</u> TCTAGTCGCCCAATAGTATTAGAA                     | BpfG C-terminal 14 aa HA knock-in                                                            |
| BpfG-C14-3R                 | ATGTAC <u>CTGCAGTTCTTCAAGCCAATCTAGTTTTGC</u>                       | BpfG C-terminal 14 aa HA knock-in                                                            |
| BpfG-C14-SF                 | TTAACGGTAAACAACCTATGGCTTA                                          | BpfG C-terminal 14 aa HA knock-in                                                            |
| BpfG-C14-SR                 | CGTTGTTTAGATCGGACTCCATTT                                           | BpfG C-terminal 14 aa HA knock-in                                                            |
| BpfG-C14-OF                 | CGCTAGCAGATCGTTTTAACATCG                                           | BpfG C-terminal 14 aa HA knock-in                                                            |
| BpfG-C14-OR                 | CGAGAATACGTATGGTTTCATCTC                                           | BpfG C-terminal 14 aa HA knock-in                                                            |
| BpfG-HAKinF <sup>a</sup>    | <u>GTCCCAGACTACGCTGCGGGTGC</u> GTTAGGTGTTGACCGTCTCA<br>GGCAACCTAAA | BpfG C-terminal 14 aa HA knock-in                                                            |
| BpfG-HAKinR <sup>a</sup>    | <u>GTCGTATGGGTAGAGGAGATTTTGTCTGTGGTTGAGGTCATTCC</u><br>ATTTTTCGAG  | BpfG C-terminal 14 aa HA knock-in                                                            |
| His-CRP-F                   | ATCAACGGATCCATGGCTCTGATTGGTAAGCCAAAACC                             | Heterologous expression of CRP protein in <i>E. coli</i>                                     |
| His-CRP-R                   | TGGCCTAAGCTTAGAATTTATGCTAGGCCACTTTAATG                             | Heterologous expression of CRP protein in <i>E. coli</i>                                     |
| GST-BpfD-InF                | CGGA <u>ATTCAATACCATCATCGCTTTCTCCCTATTGTTT</u>                     | Heterologous expression of BpfD protein in <i>E. coli</i>                                    |
| GST-BpfD-InR                | AAGGAAAAAAGCGGCCGCTTATTCTAGATTTTCTGGTGGCGCA<br>ATAAA               | Heterologous expression of BpfD protein in <i>E. coli</i>                                    |
| His-CRP-R84L-F <sup>a</sup> | AAACAAGCATGTGAAATTGCAGAAATTTCA                                     | Heterologous expression of CRP-R84L protein in <i>E. coli</i> or complement CRP-R84L to CN32 |
| His-CRP-R84L-R <sup>a</sup> | AGCTCGAACCCAAGCGGTTAATTCTGCTTG                                     | Heterologous expression of CRP-R84L protein in <i>E. coli</i> or complement CRP-R84L to CN32 |
| MBP-1291-F                  | CTCCGGG <u>GATCC</u> ATGAAGGATCAAACGCAACCGTTT                      | Heterologous expression of 1291 protein in <i>E. coli</i>                                    |
| MBP-1291-R                  | GCGTAT <u>CTGCAGAGTCGGTCTTAACTATACGTCAAT</u>                       | Heterologous expression of 1291 protein in <i>E. coli</i>                                    |

<sup>a</sup> 5' phosphorylated primer.
